# Supplementary material
Source: publisher figshare collection journal article supplement (https://acs.figshare.com/ndownloader/files/29863410)
Supplement: Supplementary file 1 [file 29863410]

## Sheet: Figure S.X
Supplemental Information: Chemoproteomic analysis of UNC5246 targets.
			Normalized TMT abundance
Accession	Description	Ratio: 5246/bead	Bead control-1	Bead control-2	5246-1	5246-2	# Peptides
Q99549	M-phase phosphoprotein 8 OS=Homo sapiens GN=MPHOSPH8 PE=1 SV=2	4.07292	1417.6	1876.2	5789.8	7625.6	11
Q13185	Chromobox protein homolog 3 OS=Homo sapiens GN=CBX3 PE=1 SV=4	3.25612	1593.4	1190.5	4739.1	4325.6	12
Q13112	Chromatin assembly factor 1 subunit B OS=Homo sapiens GN=CHAF1B PE=1 SV=1	3.08475	1334.1	1314.9	4327.5	3844	11
Q13111	Chromatin assembly factor 1 subunit A OS=Homo sapiens GN=CHAF1A PE=1 SV=2	2.40892	1362.5	1084.7	3157.7	2737.4	17
P78346	Ribonuclease P protein subunit p30 OS=Homo sapiens GN=RPP30 PE=1 SV=1	2.18271	202.8	182.5	394.2	446.8	2
Q7Z4V5	Hepatoma-derived growth factor-related protein 2 OS=Homo sapiens GN=HDGFRP2 PE=1 SV=1	2.10201	2360.7	2330.8	4738.1	5123.5	21
P45973	Chromobox protein homolog 5 OS=Homo sapiens GN=CBX5 PE=1 SV=1	2.08826	2580.5	2061.5	5500.1	4193.6	15
Q96JM3	Chromosome alignment-maintaining phosphoprotein 1 OS=Homo sapiens GN=CHAMP1 PE=1 SV=2	2.08165	3505.7	2398.6	7154.2	5136.5	22
P05204	Non-histone chromosomal protein HMG-17 OS=Homo sapiens GN=HMGN2 PE=1 SV=3	2.05877	3405.6	1857.6	7178.3	3657.4	9
P83916	Chromobox protein homolog 1 OS=Homo sapiens GN=CBX1 PE=1 SV=1	1.92051	1057.6	1264.6	2277.2	2182.6	9
Q13263	Transcription intermediary factor 1-beta OS=Homo sapiens GN=TRIM28 PE=1 SV=5	1.85156	1812.3	1473.1	3205.4	2877.7	10
P06748	Nucleophosmin OS=Homo sapiens GN=NPM1 PE=1 SV=2	1.6674	12361.9	11608.8	21962.7	18006	30
Q7Z6I8	UPF0461 protein C5orf24 OS=Homo sapiens GN=C5orf24 PE=1 SV=1	1.64314	462.6	639.8	486.3	1325.1	4
Q09028	Histone-binding protein RBBP4 OS=Homo sapiens GN=RBBP4 PE=1 SV=3	1.57761	886.1	848.8	1442	1295	9
Q8NI27	THO complex subunit 2 OS=Homo sapiens GN=THOC2 PE=1 SV=2	1.57165	549	1116	610.7	2006.1	5
O95251	Histone acetyltransferase KAT7 OS=Homo sapiens GN=KAT7 PE=1 SV=1	1.53061	83.9	304.9	132.2	462.9	3
Q9NRY2	SOSS complex subunit C OS=Homo sapiens GN=INIP PE=1 SV=1	1.48646	238.4	296.9	367.1	428.6	2
P05114	Non-histone chromosomal protein HMG-14 OS=Homo sapiens GN=HMGN1 PE=1 SV=3	1.48342	3627.9	3743.7	5460.2	5475	11
P35268	60S ribosomal protein L22 OS=Homo sapiens GN=RPL22 PE=1 SV=2	1.48293	371.8	301.8	555.4	443.5	3
Q8IYB3	Serine/arginine repetitive matrix protein 1 OS=Homo sapiens GN=SRRM1 PE=1 SV=2	1.47282	802.6	955.8	1197.8	1392	7
P52926	High mobility group protein HMGI-C OS=Homo sapiens GN=HMGA2 PE=1 SV=1	1.46471	1023.3	268.7	1474.9	417.5	3
Q96MU7	YTH domain-containing protein 1 OS=Homo sapiens GN=YTHDC1 PE=1 SV=3	1.4551	304.6	626.4	497	857.7	2
P17096	High mobility group protein HMG-I/HMG-Y OS=Homo sapiens GN=HMGA1 PE=1 SV=3	1.45418	1359.5	790.3	1964	1162.2	6
O75475	PC4 and SFRS1-interacting protein OS=Homo sapiens GN=PSIP1 PE=1 SV=1	1.41962	2740.1	3048	3748.2	4468.7	20
P02777	SWISS-PROT:P02777 (Bos taurus) similar to Platelet factor 4	1.394	327.6	222.4	451.1	315.6	2
P28799	Granulins OS=Homo sapiens GN=GRN PE=1 SV=2	1.38875	471.5	756.8	711.5	994.3	5
O00479	High mobility group nucleosome-binding domain-containing protein 4 OS=Homo sapiens GN=HMGN4 PE=1 SV=3	1.38699	1360.2	1319.2	1939.2	1777.1	6
Q92804	TATA-binding protein-associated factor 2N OS=Homo sapiens GN=TAF15 PE=1 SV=1	1.36358	851.7	756.2	1199	993.5	9
Q08170	Serine/arginine-rich splicing factor 4 OS=Homo sapiens GN=SRSF4 PE=1 SV=2	1.35298	949.5	676.1	1256.4	943	13
P98179	RNA-binding protein 3 OS=Homo sapiens GN=RBM3 PE=1 SV=1	1.35044	389.1	784	506.5	1077.7	4
Q5BKZ1	DBIRD complex subunit ZNF326 OS=Homo sapiens GN=ZNF326 PE=1 SV=2	1.34551	1086.4	1092.1	1424	1507.2	7
P38159	RNA-binding motif protein, X chromosome OS=Homo sapiens GN=RBMX PE=1 SV=3	1.32281	7299.9	6084.3	9556.9	8147.8	29
P0C0S5	Histone H2A.Z OS=Homo sapiens GN=H2AFZ PE=1 SV=2	1.32011	412.2	386.6	548.1	506.4	4
P37108	Signal recognition particle 14 kDa protein OS=Homo sapiens GN=SRP14 PE=1 SV=2	1.31235	988.1	1243.7	1311.1	1617.8	6
P62899	60S ribosomal protein L31 OS=Homo sapiens GN=RPL31 PE=1 SV=1	1.31007	577	446	700.5	639.7	4
P62306	Small nuclear ribonucleoprotein F OS=Homo sapiens GN=SNRPF PE=1 SV=1	1.30806	230.4	593.8	285.1	793	2
Q7Z7K6	Centromere protein V OS=Homo sapiens GN=CENPV PE=1 SV=1	1.30618	171.4	432.5	194.5	594.3	3
Q9ULV3	Cip1-interacting zinc finger protein OS=Homo sapiens GN=CIZ1 PE=1 SV=2	1.30536	203.7	191.9	255.8	260.6	3
Q15651	High mobility group nucleosome-binding domain-containing protein 3 OS=Homo sapiens GN=HMGN3 PE=1 SV=2	1.30307	470.2	524.3	647.8	648.1	4
Q6PJT7	Zinc finger CCCH domain-containing protein 14 OS=Homo sapiens GN=ZC3H14 PE=1 SV=1	1.29069	2691.5	2401.2	3521.7	3051.4	10
P46783	40S ribosomal protein S10 OS=Homo sapiens GN=RPS10 PE=1 SV=1	1.28703	636.1	855.4	795.8	1123.8	6
Q8N108	Mesoderm induction early response protein 1 OS=Homo sapiens GN=MIER1 PE=1 SV=2	1.27802	421	438.3	522.7	575.5	2
Q14011	Cold-inducible RNA-binding protein OS=Homo sapiens GN=CIRBP PE=1 SV=1	1.27729	1401.7	952.9	1747.9	1259.6	7
Q9H6F5	Coiled-coil domain-containing protein 86 OS=Homo sapiens GN=CCDC86 PE=1 SV=1	1.26285	2498.3	3048.9	3156.3	3849	18
P13010	X-ray repair cross-complementing protein 5 OS=Homo sapiens GN=XRCC5 PE=1 SV=3	1.25909	1244.4	1892.3	1689.9	2259.5	11
Q06265	Exosome complex component RRP45 OS=Homo sapiens GN=EXOSC9 PE=1 SV=3	1.2589	1191	335.1	1566.4	354.8	4
Q9UQ35	Serine/arginine repetitive matrix protein 2 OS=Homo sapiens GN=SRRM2 PE=1 SV=2	1.25684	8407.5	9250	10675.4	11517.3	55
P62805	Histone H4 OS=Homo sapiens GN=HIST1H4A PE=1 SV=2	1.25649	6570.2	7141.7	8349.4	8879.4	13
Q9BUJ2	Heterogeneous nuclear ribonucleoprotein U-like protein 1 OS=Homo sapiens GN=HNRNPUL1 PE=1 SV=2	1.25583	735.9	657.2	929.7	819.8	8
O00422	Histone deacetylase complex subunit SAP18 OS=Homo sapiens GN=SAP18 PE=1 SV=1	1.25148	1293.1	1009.7	1498.9	1383	6
P43243	Matrin-3 OS=Homo sapiens GN=MATR3 PE=1 SV=2	1.25134	4481	4179.8	5631.4	5206.2	24
P41208	Centrin-2 OS=Homo sapiens GN=CETN2 PE=1 SV=1	1.25095	1611.7	1718	2162.8	2002.5	12
Q9UNL4	Inhibitor of growth protein 4 OS=Homo sapiens GN=ING4 PE=1 SV=1	1.2437	586.1	381.5	674.6	528.8	2
Q14978	Nucleolar and coiled-body phosphoprotein 1 OS=Homo sapiens GN=NOLC1 PE=1 SV=2	1.24306	10999.6	12274.1	13342.2	15588.5	47
Q9H0D6	5'-3' exoribonuclease 2 OS=Homo sapiens GN=XRN2 PE=1 SV=1	1.24262	399.2	332.8	498.9	410.7	4
O43172	U4/U6 small nuclear ribonucleoprotein Prp4 OS=Homo sapiens GN=PRPF4 PE=1 SV=2	1.24198	570.4	720.6	738.5	864.9	5
Q9BVW5	TIMELESS-interacting protein OS=Homo sapiens GN=TIPIN PE=1 SV=2	1.22975	181.9	195.9	230.3	234.3	2
P49458	Signal recognition particle 9 kDa protein OS=Homo sapiens GN=SRP9 PE=1 SV=2	1.22779	1645.1	1942.8	2108.3	2296.9	5
Q96A72	Protein mago nashi homolog 2 OS=Homo sapiens GN=MAGOHB PE=1 SV=1	1.22669	539.9	994.8	691.9	1190.7	4
P49674	Casein kinase I isoform epsilon OS=Homo sapiens GN=CSNK1E PE=1 SV=1	1.22629	794.7	387.4	969.6	480	4
Q9NWB6	Arginine and glutamate-rich protein 1 OS=Homo sapiens GN=ARGLU1 PE=1 SV=1	1.2247	1035.6	554.5	1275.4	672	6
Q99496	E3 ubiquitin-protein ligase RING2 OS=Homo sapiens GN=RNF2 PE=1 SV=1	1.22394	517	878.9	673.1	1035.4	8
Q12905	Interleukin enhancer-binding factor 2 OS=Homo sapiens GN=ILF2 PE=1 SV=2	1.22368	1359.1	1197.2	1646.1	1482	7
Q15906	Vacuolar protein sorting-associated protein 72 homolog OS=Homo sapiens GN=VPS72 PE=1 SV=1	1.22361	670.6	570.4	858.3	660.2	3
Q8NEY8	Periphilin-1 OS=Homo sapiens GN=PPHLN1 PE=1 SV=2	1.22091	616.4	623.9	726.4	787.9	5
Q9BW71	HIRA-interacting protein 3 OS=Homo sapiens GN=HIRIP3 PE=1 SV=3	1.2173	889.3	680.9	1067.1	844.3	9
Q9BRR8	G patch domain-containing protein 1 OS=Homo sapiens GN=GPATCH1 PE=1 SV=1	1.21709	307.9	138	381.9	160.8	2
O43660	Pleiotropic regulator 1 OS=Homo sapiens GN=PLRG1 PE=1 SV=1	1.21444	922.4	1120.6	1112.4	1368.7	8
Q86V81	THO complex subunit 4 OS=Homo sapiens GN=ALYREF PE=1 SV=3	1.21387	1223.7	1786.1	1426.5	2227	10
Q96T37	Putative RNA-binding protein 15 OS=Homo sapiens GN=RBM15 PE=1 SV=2	1.21287	308.3	474.8	404	545.8	6
P55884	Eukaryotic translation initiation factor 3 subunit B OS=Homo sapiens GN=EIF3B PE=1 SV=3	1.21138	74.1	68.3	97.3	75.2	2
Q5UIP0	Telomere-associated protein RIF1 OS=Homo sapiens GN=RIF1 PE=1 SV=2	1.21086	202.6	53.5	255.7	54.4	4
P84103	Serine/arginine-rich splicing factor 3 OS=Homo sapiens GN=SRSF3 PE=1 SV=1	1.20957	1442.3	1619.7	1826.7	1877	11
Q5T200	Zinc finger CCCH domain-containing protein 13 OS=Homo sapiens GN=ZC3H13 PE=1 SV=1	1.20702	420.3	394.1	496.3	486.7	4
Q92769	Histone deacetylase 2 OS=Homo sapiens GN=HDAC2 PE=1 SV=2	1.20675	1089.1	786.1	1337.5	925.4	8
Q9Y3X0	Coiled-coil domain-containing protein 9 OS=Homo sapiens GN=CCDC9 PE=1 SV=1	1.20607	841.3	1026.5	1015.4	1237.3	11
P55735	Protein SEC13 homolog OS=Homo sapiens GN=SEC13 PE=1 SV=3	1.20353	752.5	695.9	920.2	823	4
Q07955	Serine/arginine-rich splicing factor 1 OS=Homo sapiens GN=SRSF1 PE=1 SV=2	1.20334	4642	4243.3	5587.5	5104.5	16
Q96BK5	PIN2/TERF1-interacting telomerase inhibitor 1 OS=Homo sapiens GN=PINX1 PE=1 SV=2	1.20226	533.7	597.5	666.2	693.8	5
Q9Y3I0	tRNA-splicing ligase RtcB homolog OS=Homo sapiens GN=RTCB PE=1 SV=1	1.20044	883.4	908.7	1157.4	993.9	7
Q6ZN17	Protein lin-28 homolog B OS=Homo sapiens GN=LIN28B PE=1 SV=1	1.20026	418.5	339	507.1	402.1	3
P14866	Heterogeneous nuclear ribonucleoprotein L OS=Homo sapiens GN=HNRNPL PE=1 SV=2	1.19686	3825.5	2814.1	4640.8	3305.9	17
P62857	40S ribosomal protein S28 OS=Homo sapiens GN=RPS28 PE=1 SV=1	1.19458	522.2	558.6	581.3	709.8	4
Q15424	Scaffold attachment factor B1 OS=Homo sapiens GN=SAFB PE=1 SV=4	1.19288	6291.3	7153.3	7647.3	8390.5	34
Q99653	Calcineurin B homologous protein 1 OS=Homo sapiens GN=CHP1 PE=1 SV=3	1.19232	41.9	361.6	35.9	445.2	2
Q9UKM9	RNA-binding protein Raly OS=Homo sapiens GN=RALY PE=1 SV=1	1.19067	902.6	1926.4	1101.5	2266.9	11
Q9UNZ5	Leydig cell tumor 10 kDa protein homolog OS=Homo sapiens GN=C19orf53 PE=1 SV=1	1.19014	944	701.6	1111.6	846.9	3
P84090	Enhancer of rudimentary homolog OS=Homo sapiens GN=ERH PE=1 SV=1	1.18673	2264.7	2197.4	2585	2710.3	9
Q9BXF6	Rab11 family-interacting protein 5 OS=Homo sapiens GN=RAB11FIP5 PE=1 SV=1	1.18374	480.5	110	588.8	110.2	3
Q9Y5S9	RNA-binding protein 8A OS=Homo sapiens GN=RBM8A PE=1 SV=1	1.1835	329	751.1	330.1	948.2	4
P46087	Probable 28S rRNA (cytosine(4447)-C(5))-methyltransferase OS=Homo sapiens GN=NOP2 PE=1 SV=2	1.18315	1781.3	2614	2186.1	3014.2	15
Q8N684	Cleavage and polyadenylation specificity factor subunit 7 OS=Homo sapiens GN=CPSF7 PE=1 SV=1	1.18059	553.2	657.3	588.8	840.3	6
Q9UN86	Ras GTPase-activating protein-binding protein 2 OS=Homo sapiens GN=G3BP2 PE=1 SV=2	1.17897	1840.7	1695	2182.8	1985.7	8
Q9UMY1	Nucleolar protein 7 OS=Homo sapiens GN=NOL7 PE=1 SV=2	1.17757	1314.3	1363	1527.2	1625.5	6
P35637	RNA-binding protein FUS OS=Homo sapiens GN=FUS PE=1 SV=1	1.17735	1993.2	2403.3	2311.9	2864.3	11
P57740	Nuclear pore complex protein Nup107 OS=Homo sapiens GN=NUP107 PE=1 SV=1	1.17534	284.4	84.6	327.6	106.1	3
Q8N9T8	Protein KRI1 homolog OS=Homo sapiens GN=KRI1 PE=1 SV=3	1.17456	473	1015.3	473.7	1274.4	7
P49750	YLP motif-containing protein 1 OS=Homo sapiens GN=YLPM1 PE=1 SV=3	1.17448	1276.2	714.3	1483	854.8	7
P53999	Activated RNA polymerase II transcriptional coactivator p15 OS=Homo sapiens GN=SUB1 PE=1 SV=3	1.17416	2981.7	3319.5	3672.7	3725.9	11
P67809	Nuclease-sensitive element-binding protein 1 OS=Homo sapiens GN=YBX1 PE=1 SV=3	1.17389	2610.9	3055.9	3111.3	3540.9	14
Q9UMS4	Pre-mRNA-processing factor 19 OS=Homo sapiens GN=PRPF19 PE=1 SV=1	1.17321	1176.4	1264.5	1390.3	1473.4	10
Q9UPT8	Zinc finger CCCH domain-containing protein 4 OS=Homo sapiens GN=ZC3H4 PE=1 SV=3	1.17166	446.8	749.2	493.6	907.7	5
Q5SW79	Centrosomal protein of 170 kDa OS=Homo sapiens GN=CEP170 PE=1 SV=1	1.17094	222.5	272.4	224.3	355.2	4
Q9UKV3	Apoptotic chromatin condensation inducer in the nucleus OS=Homo sapiens GN=ACIN1 PE=1 SV=2	1.17087	6206.2	7245.3	6973.3	8776.7	43
P42285	Superkiller viralicidic activity 2-like 2 OS=Homo sapiens GN=SKIV2L2 PE=1 SV=3	1.16817	1566.1	855.9	1811.1	1018.2	10
Q9Y2W1	Thyroid hormone receptor-associated protein 3 OS=Homo sapiens GN=THRAP3 PE=1 SV=2	1.16748	6842.5	6699.8	8135.4	7674.9	30
P62826	GTP-binding nuclear protein Ran OS=Homo sapiens GN=RAN PE=1 SV=3	1.16501	357.3	286.9	417.7	332.8	2
Q96C57	Uncharacterized protein C12orf43 OS=Homo sapiens GN=C12orf43 PE=1 SV=2	1.16387	1390	1105.3	1625.1	1279.1	8
Q14157	Ubiquitin-associated protein 2-like OS=Homo sapiens GN=UBAP2L PE=1 SV=2	1.16126	704.2	973.8	797.1	1151.5	7
Q08945	FACT complex subunit SSRP1 OS=Homo sapiens GN=SSRP1 PE=1 SV=1	1.1606	901.3	796.1	1051.4	918.6	7
P52272	Heterogeneous nuclear ribonucleoprotein M OS=Homo sapiens GN=HNRNPM PE=1 SV=3	1.16	6720.6	6995	7714.9	8195.2	33
Q86VM9	Zinc finger CCCH domain-containing protein 18 OS=Homo sapiens GN=ZC3H18 PE=1 SV=2	1.15982	2919.8	3668.1	3343.8	4297	21
Q02880	DNA topoisomerase 2-beta OS=Homo sapiens GN=TOP2B PE=1 SV=3	1.1598	68	363.8	69.6	431.2	6
Q8IZQ5	Selenoprotein H OS=Homo sapiens GN=SELENOH PE=1 SV=2	1.15975	603.9	659.3	637.1	827.9	4
P22626	Heterogeneous nuclear ribonucleoproteins A2/B1 OS=Homo sapiens GN=HNRNPA2B1 PE=1 SV=2	1.15911	5800.6	5447.9	6485.1	6553.2	21
P47914	60S ribosomal protein L29 OS=Homo sapiens GN=RPL29 PE=1 SV=2	1.15685	523.8	158.4	582.5	206.7	2
Q99729	Heterogeneous nuclear ribonucleoprotein A/B OS=Homo sapiens GN=HNRNPAB PE=1 SV=2	1.15639	2244.1	1682	2611.1	1929	13
P61244	Protein max OS=Homo sapiens GN=MAX PE=1 SV=1	1.15491	629.3	826.4	717.4	963.8	4
Q15061	WD repeat-containing protein 43 OS=Homo sapiens GN=WDR43 PE=1 SV=3	1.15238	1861.3	2521.3	2163.3	2887.1	12
Q15717	ELAV-like protein 1 OS=Homo sapiens GN=ELAVL1 PE=1 SV=2	1.15086	1003	1229.5	1183	1386.3	7
Q16629	Serine/arginine-rich splicing factor 7 OS=Homo sapiens GN=SRSF7 PE=1 SV=1	1.15033	2227.9	3097.6	2663.7	3462.4	13
P26599	Polypyrimidine tract-binding protein 1 OS=Homo sapiens GN=PTBP1 PE=1 SV=1	1.14921	1664.3	922	1924	1048.2	8
P35269	General transcription factor IIF subunit 1 OS=Homo sapiens GN=GTF2F1 PE=1 SV=2	1.14901	1306.3	1451.9	1432.6	1736.6	8
Q9NWH9	SAFB-like transcription modulator OS=Homo sapiens GN=SLTM PE=1 SV=2	1.14799	464.5	315.3	519.1	376.1	3
P00761 SWISS-PROT:P00761	Trypsin - Sus scrofa (Pig).	1.14626	4223.7	4073	5038.9	4471.3	9
Q8NG27	E3 ubiquitin-protein ligase Praja-1 OS=Homo sapiens GN=PJA1 PE=1 SV=2	1.14624	307.6	254.5	350.9	293.4	2
Q01658	Protein Dr1 OS=Homo sapiens GN=DR1 PE=1 SV=1	1.14553	27	293.9	28.2	339.4	2
Q15233	Non-POU domain-containing octamer-binding protein OS=Homo sapiens GN=NONO PE=1 SV=4	1.14533	3551.7	3871.2	4091	4410.7	21
P61313	60S ribosomal protein L15 OS=Homo sapiens GN=RPL15 PE=1 SV=2	1.14531	914.5	1143.8	950.5	1406.9	7
Q6UN15	Pre-mRNA 3'-end-processing factor FIP1 OS=Homo sapiens GN=FIP1L1 PE=1 SV=1	1.14313	1624	2103.5	1798.1	2462.9	10
Q9HCD5	Nuclear receptor coactivator 5 OS=Homo sapiens GN=NCOA5 PE=1 SV=2	1.14209	708.6	1124.1	844.4	1248.7	4
P62995	Transformer-2 protein homolog beta OS=Homo sapiens GN=TRA2B PE=1 SV=1	1.14037	1890	1983.4	2176.7	2240.4	10
P05198	Eukaryotic translation initiation factor 2 subunit 1 OS=Homo sapiens GN=EIF2S1 PE=1 SV=3	1.14032	2039	1905.6	2349.1	2149	11
P40222	Alpha-taxilin OS=Homo sapiens GN=TXLNA PE=1 SV=3	1.13903	119.8	380.1	117.4	452	4
O15182	Centrin-3 OS=Homo sapiens GN=CETN3 PE=1 SV=2	1.13868	446.1	727.8	530.3	806.4	3
Q9ULV4	Coronin-1C OS=Homo sapiens GN=CORO1C PE=1 SV=1	1.13689	878	858.4	970.8	1003.3	6
Q9UKD2	mRNA turnover protein 4 homolog OS=Homo sapiens GN=MRTO4 PE=1 SV=2	1.13681	755	686.4	912.7	725.9	3
O43818	U3 small nucleolar RNA-interacting protein 2 OS=Homo sapiens GN=RRP9 PE=1 SV=1	1.13677	1055.8	1506.1	1144.9	1767.4	7
P13987	CD59 glycoprotein OS=Homo sapiens GN=CD59 PE=1 SV=1	1.13638	408.2	567	480.4	627.8	4
Q9NYF8	Bcl-2-associated transcription factor 1 OS=Homo sapiens GN=BCLAF1 PE=1 SV=2	1.13473	4250.2	5396	4932.8	6013	28
Q8IX12	Cell division cycle and apoptosis regulator protein 1 OS=Homo sapiens GN=CCAR1 PE=1 SV=2	1.1313	314.8	439.2	355.2	497.8	3
Q96MF7	E3 SUMO-protein ligase NSE2 OS=Homo sapiens GN=NSMCE2 PE=1 SV=2	1.13107	447.9	927.7	526.3	1029.6	5
O75494	Serine/arginine-rich splicing factor 10 OS=Homo sapiens GN=SRSF10 PE=1 SV=1	1.13107	1703.1	2008.7	1900.7	2297.6	9
O60828	Polyglutamine-binding protein 1 OS=Homo sapiens GN=PQBP1 PE=1 SV=1	1.12953	786.7	399.1	860.8	478.6	6
P49959	Double-strand break repair protein MRE11 OS=Homo sapiens GN=MRE11 PE=1 SV=3	1.12947	630.6	598.3	727.6	660.4	9
P62266	40S ribosomal protein S23 OS=Homo sapiens GN=RPS23 PE=1 SV=3	1.12922	429.2	395	444.8	485.9	4
P18887	DNA repair protein XRCC1 OS=Homo sapiens GN=XRCC1 PE=1 SV=2	1.12906	277.2	338.8	308.6	386.9	2
Q15007	Pre-mRNA-splicing regulator WTAP OS=Homo sapiens GN=WTAP PE=1 SV=2	1.12747	949.7	969.9	1081.6	1082.7	7
Q53GS9	U4/U6.U5 tri-snRNP-associated protein 2 OS=Homo sapiens GN=USP39 PE=1 SV=2	1.12657	368.6	205.8	421.9	225.2	3
Q01844	RNA-binding protein EWS OS=Homo sapiens GN=EWSR1 PE=1 SV=1	1.12613	777.2	676.8	882.6	754.8	3
P62269	40S ribosomal protein S18 OS=Homo sapiens GN=RPS18 PE=1 SV=3	1.12544	735.3	581.7	826.9	655.3	5
O14979	Heterogeneous nuclear ribonucleoprotein D-like OS=Homo sapiens GN=HNRNPDL PE=1 SV=3	1.12496	3899.7	3517.1	4385.7	3957.9	16
O14974	Protein phosphatase 1 regulatory subunit 12A OS=Homo sapiens GN=PPP1R12A PE=1 SV=1	1.12304	1829.8	1638.3	2053.5	1841.3	12
P09651	Heterogeneous nuclear ribonucleoprotein A1 OS=Homo sapiens GN=HNRNPA1 PE=1 SV=5	1.12276	3560.2	2756.4	4081.7	3010.3	16
P62847	40S ribosomal protein S24 OS=Homo sapiens GN=RPS24 PE=1 SV=1	1.12235	1048.3	801.3	1183.9	892	3
O75531	Barrier-to-autointegration factor OS=Homo sapiens GN=BANF1 PE=1 SV=1	1.12231	452.5	285	540.1	287.6	3
Q1KMD3	Heterogeneous nuclear ribonucleoprotein U-like protein 2 OS=Homo sapiens GN=HNRNPUL2 PE=1 SV=1	1.12075	909.5	894.2	992.4	1029.1	6
Q15014	Mortality factor 4-like protein 2 OS=Homo sapiens GN=MORF4L2 PE=1 SV=1	1.11981	435.1	960.5	465.5	1097.3	4
P11940	Polyadenylate-binding protein 1 OS=Homo sapiens GN=PABPC1 PE=1 SV=2	1.11958	2881.1	2570.3	3217.1	2886.2	20
Q14008	Cytoskeleton-associated protein 5 OS=Homo sapiens GN=CKAP5 PE=1 SV=3	1.11816	274	405.6	301.8	458.1	3
Q13247	Serine/arginine-rich splicing factor 6 OS=Homo sapiens GN=SRSF6 PE=1 SV=2	1.1181	4167.6	4811.7	4612.8	5427	21
P62917	60S ribosomal protein L8 OS=Homo sapiens GN=RPL8 PE=1 SV=2	1.1181	3095.2	3243.6	3386	3701.4	12
Q08211	ATP-dependent RNA helicase A OS=Homo sapiens GN=DHX9 PE=1 SV=4	1.11778	4258.1	3361.3	4806.8	3710	27
Q969G3	SWI/SNF-related matrix-associated actin-dependent regulator of chromatin subfamily E member 1 OS=Homo sapiens GN=SMARCE1 PE=1 SV=2	1.11699	203.5	518.8	254.4	552.4	3
P05388	60S acidic ribosomal protein P0 OS=Homo sapiens GN=RPLP0 PE=1 SV=1	1.11689	1584.7	1906.7	1725.7	2173.8	12
Q9C0J8	pre-mRNA 3' end processing protein WDR33 OS=Homo sapiens GN=WDR33 PE=1 SV=2	1.11644	721.4	522.2	769.9	618.5	9
Q9UHB6	LIM domain and actin-binding protein 1 OS=Homo sapiens GN=LIMA1 PE=1 SV=1	1.11599	2977.8	3602.8	3264.3	4079.6	20
Q69YQ0	Cytospin-A OS=Homo sapiens GN=SPECC1L PE=1 SV=2	1.11565	1811.1	2143.8	2045.4	2366.9	14
Q99590	Protein SCAF11 OS=Homo sapiens GN=SCAF11 PE=1 SV=2	1.11528	674.7	343.7	744	391.8	6
Q9H0S4	Probable ATP-dependent RNA helicase DDX47 OS=Homo sapiens GN=DDX47 PE=1 SV=1	1.11522	133.3	285.9	186.2	281.3	5
Q14676	Mediator of DNA damage checkpoint protein 1 OS=Homo sapiens GN=MDC1 PE=1 SV=3	1.11417	2532.8	1608.4	2854.1	1759.9	25
O60832	H/ACA ribonucleoprotein complex subunit 4 OS=Homo sapiens GN=DKC1 PE=1 SV=3	1.11158	2797.9	3492.5	3097.1	3895.2	15
Q9H5V9	UPF0428 protein CXorf56 OS=Homo sapiens GN=CXorf56 PE=1 SV=1	1.11007	408.4	346.6	454.7	383.4	3
O60231	Putative pre-mRNA-splicing factor ATP-dependent RNA helicase DHX16 OS=Homo sapiens GN=DHX16 PE=1 SV=2	1.10985	473.2	664.7	533.3	729.6	4
Q14151	Scaffold attachment factor B2 OS=Homo sapiens GN=SAFB2 PE=1 SV=1	1.10959	2792.6	2657.5	3169.7	2877.7	28
Q15555	Microtubule-associated protein RP/EB family member 2 OS=Homo sapiens GN=MAPRE2 PE=1 SV=1	1.1093	393.7	330	420.4	382.4	3
Q9P258	Protein RCC2 OS=Homo sapiens GN=RCC2 PE=1 SV=2	1.10823	589.9	870	679.5	938.4	5
Q9Y5A9	YTH domain-containing family protein 2 OS=Homo sapiens GN=YTHDF2 PE=1 SV=2	1.10695	840.7	370.2	938	402.4	3
Q9H307	Pinin OS=Homo sapiens GN=PNN PE=1 SV=4	1.10619	5815.6	5861.2	6342.8	6574	34
O95816	BAG family molecular chaperone regulator 2 OS=Homo sapiens GN=BAG2 PE=1 SV=1	1.10607	489.5	758.7	561.3	819.3	5
Q03252	Lamin-B2 OS=Homo sapiens GN=LMNB2 PE=1 SV=4	1.10548	2341.4	2397.7	2596.8	2642.2	14
Q9NYL9	Tropomodulin-3 OS=Homo sapiens GN=TMOD3 PE=1 SV=1	1.10544	763.9	804.8	864.8	869.3	5
O43290	U4/U6.U5 tri-snRNP-associated protein 1 OS=Homo sapiens GN=SART1 PE=1 SV=1	1.10388	3310	3160.2	3515.4	3626.9	22
O76021	Ribosomal L1 domain-containing protein 1 OS=Homo sapiens GN=RSL1D1 PE=1 SV=3	1.10385	3471.6	3184.9	3862.4	3485.4	17
Q9BXS6	Nucleolar and spindle-associated protein 1 OS=Homo sapiens GN=NUSAP1 PE=1 SV=1	1.10347	680.8	392.9	750.4	434.4	2
P20042	Eukaryotic translation initiation factor 2 subunit 2 OS=Homo sapiens GN=EIF2S2 PE=1 SV=2	1.10302	1908.7	1503.2	2076	1687.4	12
O43852	Calumenin OS=Homo sapiens GN=CALU PE=1 SV=2	1.10268	182.6	369.6	190.2	418.7	2
Q14241	Elongin-A OS=Homo sapiens GN=ELOA PE=1 SV=2	1.10266	196	145.9	222.7	154.3	2
P62753	40S ribosomal protein S6 OS=Homo sapiens GN=RPS6 PE=1 SV=1	1.10266	2601.6	1736.2	2760.8	2022.3	9
Q9BXP5	Serrate RNA effector molecule homolog OS=Homo sapiens GN=SRRT PE=1 SV=1	1.10192	1242	1376.6	1383	1502.5	6
Q6RFH5	WD repeat-containing protein 74 OS=Homo sapiens GN=WDR74 PE=1 SV=1	1.10155	641.5	625.8	736.8	659.2	4
O15234	Protein CASC3 OS=Homo sapiens GN=CASC3 PE=1 SV=2	1.10155	930.2	564.6	1095.7	550.9	3
P19338	Nucleolin OS=Homo sapiens GN=NCL PE=1 SV=3	1.10118	14747.7	13931.4	16174.2	15406.6	52
Q9NZI8	Insulin-like growth factor 2 mRNA-binding protein 1 OS=Homo sapiens GN=IGF2BP1 PE=1 SV=2	1.10034	1766.6	1890.8	1924.7	2099.7	10
Q4VCS5	Angiomotin OS=Homo sapiens GN=AMOT PE=1 SV=1	1.10009	1212	1076	1290.3	1226.7	9
Q9Y3C6	Peptidyl-prolyl cis-trans isomerase-like 1 OS=Homo sapiens GN=PPIL1 PE=1 SV=1	1.09961	549.3	760.8	561.4	879.2	2
P49790	Nuclear pore complex protein Nup153 OS=Homo sapiens GN=NUP153 PE=1 SV=2	1.09945	1866.8	2266	2048.5	2495.3	18
Q75N03	E3 ubiquitin-protein ligase Hakai OS=Homo sapiens GN=CBLL1 PE=1 SV=1	1.09881	270.8	250.4	311.3	261.4	2
P38646	Stress-70 protein, mitochondrial OS=Homo sapiens GN=HSPA9 PE=1 SV=2	1.09827	2619.7	2906.1	2814.8	3254	19
Q9NV06	DDB1- and CUL4-associated factor 13 OS=Homo sapiens GN=DCAF13 PE=1 SV=2	1.09825	184.1	1096.3	230.2	1176	5
O94842	TOX high mobility group box family member 4 OS=Homo sapiens GN=TOX4 PE=1 SV=1	1.09807	360.7	817	396.7	896.5	5
Q92576	PHD finger protein 3 OS=Homo sapiens GN=PHF3 PE=1 SV=3	1.09801	152.6	506.5	192.5	531.2	2
Q9H501	ESF1 homolog OS=Homo sapiens GN=ESF1 PE=1 SV=1	1.09637	349	342.1	376.8	380.9	2
Q14137	Ribosome biogenesis protein BOP1 OS=Homo sapiens GN=BOP1 PE=1 SV=2	1.09554	2184.1	1804.7	2461.6	1908.3	17
Q12906	Interleukin enhancer-binding factor 3 OS=Homo sapiens GN=ILF3 PE=1 SV=3	1.09514	3042.2	3290.9	3418.3	3517.3	18
Q8TDD1	ATP-dependent RNA helicase DDX54 OS=Homo sapiens GN=DDX54 PE=1 SV=2	1.09502	727.1	230.6	758	290.7	2
O75528	Transcriptional adapter 3 OS=Homo sapiens GN=TADA3 PE=1 SV=1	1.09498	28	103.6	31.4	112.7	3
P46782	40S ribosomal protein S5 OS=Homo sapiens GN=RPS5 PE=1 SV=4	1.09481	597.3	404.7	651.6	445.4	3
P07910	Heterogeneous nuclear ribonucleoproteins C1/C2 OS=Homo sapiens GN=HNRNPC PE=1 SV=4	1.09455	6138.9	5863.4	6214.8	6922.3	20
Q8WUD4	Coiled-coil domain-containing protein 12 OS=Homo sapiens GN=CCDC12 PE=1 SV=1	1.09447	716.2	830.4	823.2	869.5	6
Q9Y520	Protein PRRC2C OS=Homo sapiens GN=PRRC2C PE=1 SV=4	1.09395	3560.7	5409.9	3886.7	5926.7	27
Q8N5P1	Zinc finger CCCH domain-containing protein 8 OS=Homo sapiens GN=ZC3H8 PE=1 SV=2	1.09343	412.6	894.2	442.4	986.5	4
Q96DF8	Protein DGCR14 OS=Homo sapiens GN=DGCR14 PE=1 SV=1	1.09314	368.6	313.2	419.5	325.8	5
P62158	Calmodulin OS=Homo sapiens GN=CALM1 PE=1 SV=2	1.09292	623.3	663.8	684.1	722.6	4
Q13151	Heterogeneous nuclear ribonucleoprotein A0 OS=Homo sapiens GN=HNRNPA0 PE=1 SV=1	1.09232	1256.5	1727.8	1404.1	1855.7	6
P62854	40S ribosomal protein S26 OS=Homo sapiens GN=RPS26 PE=1 SV=3	1.09207	299.8	446.4	318.3	496.6	3
P23246	Splicing factor, proline- and glutamine-rich OS=Homo sapiens GN=SFPQ PE=1 SV=2	1.09111	8066.5	7955.1	8860.6	8620.7	34
P07196	Neurofilament light polypeptide OS=Homo sapiens GN=NEFL PE=1 SV=3	1.09091	544.2	565.7	577	633.8	5
Q09161	Nuclear cap-binding protein subunit 1 OS=Homo sapiens GN=NCBP1 PE=1 SV=1	1.09009	165.5	298.5	183.2	322.6	2
Q9UKX7	Nuclear pore complex protein Nup50 OS=Homo sapiens GN=NUP50 PE=1 SV=2	1.08894	2400.2	1761	2651.8	1879.5	13
P12270	Nucleoprotein TPR OS=Homo sapiens GN=TPR PE=1 SV=3	1.08889	11469	9382.3	12148.4	10556.3	62
O95218	Zinc finger Ran-binding domain-containing protein 2 OS=Homo sapiens GN=ZRANB2 PE=1 SV=2	1.08881	2341.8	3021.5	2649.9	3189.7	15
Q96QC0	Serine/threonine-protein phosphatase 1 regulatory subunit 10 OS=Homo sapiens GN=PPP1R10 PE=1 SV=1	1.08747	793.7	532.4	865.8	576.3	5
Q4VC05	B-cell CLL/lymphoma 7 protein family member A OS=Homo sapiens GN=BCL7A PE=1 SV=1	1.08606	442.8	453.1	477.2	495.8	3
Q5RKV6	Exosome complex component MTR3 OS=Homo sapiens GN=EXOSC6 PE=1 SV=1	1.08603	1391.1	873.1	1528	931	6
P31689	DnaJ homolog subfamily A member 1 OS=Homo sapiens GN=DNAJA1 PE=1 SV=2	1.08395	1237.5	2041.9	1319.2	2235.5	11
P12956	X-ray repair cross-complementing protein 6 OS=Homo sapiens GN=XRCC6 PE=1 SV=2	1.08323	1693.3	954.8	1967.4	901.1	10
Q13601	KRR1 small subunit processome component homolog OS=Homo sapiens GN=KRR1 PE=1 SV=4	1.08226	578.2	558.5	615.3	614.9	3
P27816	Microtubule-associated protein 4 OS=Homo sapiens GN=MAP4 PE=1 SV=3	1.08179	881	1138.7	960.9	1224	6
Q16576	Histone-binding protein RBBP7 OS=Homo sapiens GN=RBBP7 PE=1 SV=1	1.08053	229.8	153.9	242.7	171.9	7
Q16630	Cleavage and polyadenylation specificity factor subunit 6 OS=Homo sapiens GN=CPSF6 PE=1 SV=2	1.08035	922.7	1328.7	1034.9	1397.4	8
Q9P2M7	Cingulin OS=Homo sapiens GN=CGN PE=1 SV=2	1.07996	4019.8	3159.9	4411.9	3341.9	27
P52292	Importin subunit alpha-1 OS=Homo sapiens GN=KPNA2 PE=1 SV=1	1.07908	746.9	1189.2	1013.3	1075.9	8
P52948	Nuclear pore complex protein Nup98-Nup96 OS=Homo sapiens GN=NUP98 PE=1 SV=4	1.07844	1200.2	1123.8	1310.1	1196.2	6
Q96C01	Protein FAM136A OS=Homo sapiens GN=FAM136A PE=1 SV=1	1.07805	421.7	372.7	469.8	386.6	3
Q86U42	Polyadenylate-binding protein 2 OS=Homo sapiens GN=PABPN1 PE=1 SV=3	1.07742	1076.2	1721.7	1197	1817.5	8
Q8WYH8	Inhibitor of growth protein 5 OS=Homo sapiens GN=ING5 PE=1 SV=1	1.07695	98.1	391.8	112.4	415.2	2
Q9P2E9	Ribosome-binding protein 1 OS=Homo sapiens GN=RRBP1 PE=1 SV=4	1.07642	3366.6	3790.2	3670.4	4033.3	23
Q07666	KH domain-containing, RNA-binding, signal transduction-associated protein 1 OS=Homo sapiens GN=KHDRBS1 PE=1 SV=1	1.07614	1334.5	2320.4	1440.4	2492.8	6
Q99575	Ribonucleases P/MRP protein subunit POP1 OS=Homo sapiens GN=POP1 PE=1 SV=2	1.07574	221.5	272.3	229.6	301.6	6
Q9Y383	Putative RNA-binding protein Luc7-like 2 OS=Homo sapiens GN=LUC7L2 PE=1 SV=2	1.07546	1362	1148.1	1484.7	1214.8	5
P20700	Lamin-B1 OS=Homo sapiens GN=LMNB1 PE=1 SV=2	1.07544	3484.1	4393.3	3678.2	4793.5	23
P59998	Actin-related protein 2/3 complex subunit 4 OS=Homo sapiens GN=ARPC4 PE=1 SV=3	1.0749	134.8	260.4	151.9	272.9	2
P48634	Protein PRRC2A OS=Homo sapiens GN=PRRC2A PE=1 SV=3	1.07476	1755.1	1978.4	1928.9	2083.7	23
O00571	ATP-dependent RNA helicase DDX3X OS=Homo sapiens GN=DDX3X PE=1 SV=3	1.07427	2349.2	2969.5	2474.1	3239.6	15
Q15149	Plectin OS=Homo sapiens GN=PLEC PE=1 SV=3	1.07206	7904.4	7473.7	8315.7	8170.6	60
Q96I24	Far upstream element-binding protein 3 OS=Homo sapiens GN=FUBP3 PE=1 SV=2	1.07189	171.9	1162.1	158.9	1271	4
Q14974	Importin subunit beta-1 OS=Homo sapiens GN=KPNB1 PE=1 SV=2	1.07087	578.2	395.4	632	410.6	5
Q0ZGT2	Nexilin OS=Homo sapiens GN=NEXN PE=1 SV=1	1.07086	1151.5	732.6	1232.7	784.9	9
P22087	rRNA 2'-O-methyltransferase fibrillarin OS=Homo sapiens GN=FBL PE=1 SV=2	1.06976	2566.1	2029.5	2827.7	2088.5	11
P09012	U1 small nuclear ribonucleoprotein A OS=Homo sapiens GN=SNRPA PE=1 SV=3	1.06935	2765.4	2839.5	2928.3	3065.3	10
Q14980	Nuclear mitotic apparatus protein 1 OS=Homo sapiens GN=NUMA1 PE=1 SV=2	1.06884	2069.3	2053.4	2177.3	2229.2	16
Q6I9Y2	THO complex subunit 7 homolog OS=Homo sapiens GN=THOC7 PE=1 SV=3	1.06838	475.6	355	532	355.4	5
Q9UNP9	Peptidyl-prolyl cis-trans isomerase E OS=Homo sapiens GN=PPIE PE=1 SV=1	1.06788	1055.2	915.9	1117.9	987	8
Q9GZL7	Ribosome biogenesis protein WDR12 OS=Homo sapiens GN=WDR12 PE=1 SV=2	1.06621	1758.9	1536.8	1888.4	1625.5	9
Q9Y448	Small kinetochore-associated protein OS=Homo sapiens GN=KNSTRN PE=1 SV=2	1.06473	847.3	841.2	884	913.8	3
P46060	Ran GTPase-activating protein 1 OS=Homo sapiens GN=RANGAP1 PE=1 SV=1	1.06446	120.6	341.7	116.3	375.8	2
Q96EY4	Translation machinery-associated protein 16 OS=Homo sapiens GN=TMA16 PE=1 SV=2	1.06441	544	817.5	509.4	939.8	4
O43809	Cleavage and polyadenylation specificity factor subunit 5 OS=Homo sapiens GN=NUDT21 PE=1 SV=1	1.06418	1668.4	968.1	1764.7	1041	8
Q8IZL8	Proline-, glutamic acid- and leucine-rich protein 1 OS=Homo sapiens GN=PELP1 PE=1 SV=2	1.06405	758.4	395.4	886.2	341.5	9
P31942	Heterogeneous nuclear ribonucleoprotein H3 OS=Homo sapiens GN=HNRNPH3 PE=1 SV=2	1.06398	909.1	1043.1	957	1120.1	7
Q8N163	Cell cycle and apoptosis regulator protein 2 OS=Homo sapiens GN=CCAR2 PE=1 SV=2	1.06393	1002.3	159.9	1089.4	147.1	5
Q13148	TAR DNA-binding protein 43 OS=Homo sapiens GN=TARDBP PE=1 SV=1	1.06372	497.4	555.7	550.3	569.9	2
Q13868	Exosome complex component RRP4 OS=Homo sapiens GN=EXOSC2 PE=1 SV=2	1.0635	61.9	692.4	58.6	743.6	3
Q9BRQ6	MICOS complex subunit MIC25 OS=Homo sapiens GN=CHCHD6 PE=1 SV=1	1.06334	464	532.2	473.6	585.7	3
Q5QJE6	Deoxynucleotidyltransferase terminal-interacting protein 2 OS=Homo sapiens GN=DNTTIP2 PE=1 SV=2	1.0606	408.6	470.9	435.9	496.9	3
Q9NX63	MICOS complex subunit MIC19 OS=Homo sapiens GN=CHCHD3 PE=1 SV=1	1.06049	2283.1	2638.6	2318.6	2900.8	14
Q14684	Ribosomal RNA processing protein 1 homolog B OS=Homo sapiens GN=RRP1B PE=1 SV=3	1.05954	121.6	106.8	133.9	108.1	2
Q9BY77	Polymerase delta-interacting protein 3 OS=Homo sapiens GN=POLDIP3 PE=1 SV=2	1.05796	436.9	206.7	463.7	217.2	5
Q13573	SNW domain-containing protein 1 OS=Homo sapiens GN=SNW1 PE=1 SV=1	1.05746	2809.8	3051.8	2999.4	3199	22
Q9Y3T9	Nucleolar complex protein 2 homolog OS=Homo sapiens GN=NOC2L PE=1 SV=4	1.05729	642.4	724.4	686.8	758.3	3
P62312	U6 snRNA-associated Sm-like protein LSm6 OS=Homo sapiens GN=LSM6 PE=1 SV=1	1.05701	777.5	824.1	853.9	839	3
O15226	NF-kappa-B-repressing factor OS=Homo sapiens GN=NKRF PE=1 SV=2	1.05681	241	836.2	213.8	924.6	4
O43390	Heterogeneous nuclear ribonucleoprotein R OS=Homo sapiens GN=HNRNPR PE=1 SV=1	1.05598	3094.4	2182.2	3283.6	2288.4	16
Q96SB3	Neurabin-2 OS=Homo sapiens GN=PPP1R9B PE=1 SV=2	1.05582	2647.1	1948.1	2748.7	2103	15
P08670	Vimentin OS=Homo sapiens GN=VIM PE=1 SV=4	1.05572	17235.7	16520	18015	17621.4	53
Q96CT7	Coiled-coil domain-containing protein 124 OS=Homo sapiens GN=CCDC124 PE=1 SV=1	1.05545	1387.8	1775.2	1400	1938.4	10
Q9BVJ6	U3 small nucleolar RNA-associated protein 14 homolog A OS=Homo sapiens GN=UTP14A PE=1 SV=1	1.05445	381.4	531.4	398	564.5	5
P18754	Regulator of chromosome condensation OS=Homo sapiens GN=RCC1 PE=1 SV=1	1.05426	569.5	694.8	595	737.9	4
Q15287	RNA-binding protein with serine-rich domain 1 OS=Homo sapiens GN=RNPS1 PE=1 SV=1	1.05326	685.1	584.1	737.8	599	4
Q9UIG0	Tyrosine-protein kinase BAZ1B OS=Homo sapiens GN=BAZ1B PE=1 SV=2	1.05301	113	522.7	121.1	548.3	3
Q15649	Zinc finger HIT domain-containing protein 3 OS=Homo sapiens GN=ZNHIT3 PE=1 SV=2	1.05253	553.8	146.8	619.3	118.1	4
Q9BZI7	Regulator of nonsense transcripts 3B OS=Homo sapiens GN=UPF3B PE=1 SV=1	1.0521	464.5	343.6	472.1	378.1	5
P41091	Eukaryotic translation initiation factor 2 subunit 3 OS=Homo sapiens GN=EIF2S3 PE=1 SV=3	1.05175	2154.4	2191.2	2172.7	2397.8	13
Q9BW27	Nuclear pore complex protein Nup85 OS=Homo sapiens GN=NUP85 PE=1 SV=1	1.05166	423.7	273.1	464.8	268	2
Q14126	Desmoglein-2 OS=Homo sapiens GN=DSG2 PE=1 SV=2	1.05118	1015.3	665	1031.3	735	7
P11388	DNA topoisomerase 2-alpha OS=Homo sapiens GN=TOP2A PE=1 SV=3	1.05092	1464.1	1104.4	1595.7	1103.6	8
O95684	FGFR1 oncogene partner OS=Homo sapiens GN=FGFR1OP PE=1 SV=1	1.0502	94.3	280.2	97.6	295.7	2
Q9Y2W2	WW domain-binding protein 11 OS=Homo sapiens GN=WBP11 PE=1 SV=1	1.04913	2268.1	3201.5	2423.5	3314.8	13
P16989	Y-box-binding protein 3 OS=Homo sapiens GN=YBX3 PE=1 SV=4	1.04845	877.7	847.7	916.5	892.5	8
P35221	Catenin alpha-1 OS=Homo sapiens GN=CTNNA1 PE=1 SV=1	1.04836	990.5	1143.5	1111	1126.2	7
P48729	Casein kinase I isoform alpha OS=Homo sapiens GN=CSNK1A1 PE=1 SV=2	1.04816	305	58.4	302.8	78.1	2
Q9P0M6	Core histone macro-H2A.2 OS=Homo sapiens GN=H2AFY2 PE=1 SV=3	1.04789	1358.6	2067.7	1487.8	2102.6	10
P04792	Heat shock protein beta-1 OS=Homo sapiens GN=HSPB1 PE=1 SV=2	1.04764	888.3	906.4	947.7	932.5	6
Q9HC36	rRNA methyltransferase 3, mitochondrial OS=Homo sapiens GN=MRM3 PE=1 SV=2	1.04716	188.3	324.9	198.4	339	3
Q6P6C2	RNA demethylase ALKBH5 OS=Homo sapiens GN=ALKBH5 PE=1 SV=2	1.04599	490.2	368.6	468.3	430	4
O14654	Insulin receptor substrate 4 OS=Homo sapiens GN=IRS4 PE=1 SV=1	1.04577	412.7	605.4	420.4	644.3	8
P18615	Negative elongation factor E OS=Homo sapiens GN=NELFE PE=1 SV=3	1.04565	409.7	405.2	452.2	399.9	4
P54727	UV excision repair protein RAD23 homolog B OS=Homo sapiens GN=RAD23B PE=1 SV=1	1.04489	457.2	732.5	436.9	806.2	3
P55081	Microfibrillar-associated protein 1 OS=Homo sapiens GN=MFAP1 PE=1 SV=2	1.04472	2515	2668.9	2508.7	2907	13
P83731	60S ribosomal protein L24 OS=Homo sapiens GN=RPL24 PE=1 SV=1	1.04457	1952.1	1597.7	2101.7	1606.3	7
P27635	60S ribosomal protein L10 OS=Homo sapiens GN=RPL10 PE=1 SV=4	1.04415	1357.7	1491.9	1382.3	1593.1	8
P51991	Heterogeneous nuclear ribonucleoprotein A3 OS=Homo sapiens GN=HNRNPA3 PE=1 SV=2	1.04395	2982.4	2210.1	3194.5	2226.2	13
Q16643	Drebrin OS=Homo sapiens GN=DBN1 PE=1 SV=4	1.04388	1761.5	1217.2	1861.5	1247.9	10
P68400	Casein kinase II subunit alpha OS=Homo sapiens GN=CSNK2A1 PE=1 SV=1	1.04386	1213.1	945.8	1274.5	979.1	8
Q9BZK7	F-box-like/WD repeat-containing protein TBL1XR1 OS=Homo sapiens GN=TBL1XR1 PE=1 SV=1	1.04381	79.7	52.7	86.9	51.3	2
Q00059	Transcription factor A, mitochondrial OS=Homo sapiens GN=TFAM PE=1 SV=1	1.04324	1518.5	836	1510.3	946	5
Q00839	Heterogeneous nuclear ribonucleoprotein U OS=Homo sapiens GN=HNRNPU PE=1 SV=6	1.04262	6403.9	7051.8	6929.4	7099.8	28
Q02543	60S ribosomal protein L18a OS=Homo sapiens GN=RPL18A PE=1 SV=2	1.04244	1612.6	1158.2	1653.3	1235.1	7
P33240	Cleavage stimulation factor subunit 2 OS=Homo sapiens GN=CSTF2 PE=1 SV=1	1.04186	665.8	1090.1	632	1197.4	9
Q96DI7	U5 small nuclear ribonucleoprotein 40 kDa protein OS=Homo sapiens GN=SNRNP40 PE=1 SV=1	1.04151	822.7	822.8	857.1	856.7	4
O95983	Methyl-CpG-binding domain protein 3 OS=Homo sapiens GN=MBD3 PE=1 SV=1	1.04118	821.6	929.2	855.5	967.4	4
Q92979	Ribosomal RNA small subunit methyltransferase NEP1 OS=Homo sapiens GN=EMG1 PE=1 SV=4	1.0409	512.1	1003.7	597.8	980	5
Q9ULR0	Pre-mRNA-splicing factor ISY1 homolog OS=Homo sapiens GN=ISY1 PE=1 SV=3	1.04076	741.5	782.1	697.9	887.8	8
P09496	Clathrin light chain A OS=Homo sapiens GN=CLTA PE=1 SV=1	1.0404	566.7	453.2	610.5	450.6	5
P31943	Heterogeneous nuclear ribonucleoprotein H OS=Homo sapiens GN=HNRNPH1 PE=1 SV=4	1.0397	994	638.3	1026.9	670.2	9
P67870	Casein kinase II subunit beta OS=Homo sapiens GN=CSNK2B PE=1 SV=1	1.03939	995.9	1337.3	1077.1	1348	6
Q10570	Cleavage and polyadenylation specificity factor subunit 1 OS=Homo sapiens GN=CPSF1 PE=1 SV=2	1.03868	95.2	592.5	92.4	621.9	5
P62136	Serine/threonine-protein phosphatase PP1-alpha catalytic subunit OS=Homo sapiens GN=PPP1CA PE=1 SV=1	1.03786	407.5	556.5	428.4	572.1	3
Q7Z417	Nuclear fragile X mental retardation-interacting protein 2 OS=Homo sapiens GN=NUFIP2 PE=1 SV=1	1.03749	2599.7	1654.6	2730.2	1683.6	17
Q15532	Protein SSXT OS=Homo sapiens GN=SS18 PE=1 SV=3	1.03661	154.2	394.9	177.4	391.8	2
O15446	DNA-directed RNA polymerase I subunit RPA34 OS=Homo sapiens GN=CD3EAP PE=1 SV=1	1.03659	1424.2	713.2	1457.9	757.7	14
Q8IX01	SURP and G-patch domain-containing protein 2 OS=Homo sapiens GN=SUGP2 PE=1 SV=2	1.03652	314	299.4	322.4	313.4	2
Q86UP2	Kinectin OS=Homo sapiens GN=KTN1 PE=1 SV=1	1.03651	1874.3	1954.8	1911.3	2057.6	12
Q16352	Alpha-internexin OS=Homo sapiens GN=INA PE=1 SV=2	1.03634	3374.7	2508.3	3555.6	2541.2	17
P26373	60S ribosomal protein L13 OS=Homo sapiens GN=RPL13 PE=1 SV=4	1.0363	2489.8	1653	2589.3	1703.9	14
Q9NY12	H/ACA ribonucleoprotein complex subunit 1 OS=Homo sapiens GN=GAR1 PE=1 SV=1	1.03577	557.9	283.6	566.8	304.8	6
Q96IZ7	Serine/Arginine-related protein 53 OS=Homo sapiens GN=RSRC1 PE=1 SV=1	1.03563	519.2	202.1	564.5	182.5	2
Q9NW13	RNA-binding protein 28 OS=Homo sapiens GN=RBM28 PE=1 SV=3	1.0354	394.1	391.2	381.6	431.5	2
Q14683	Structural maintenance of chromosomes protein 1A OS=Homo sapiens GN=SMC1A PE=1 SV=2	1.03512	2221.6	3131.2	2452.7	3088.1	14
O60934	Nibrin OS=Homo sapiens GN=NBN PE=1 SV=1	1.03488	325.7	637.5	352.3	644.5	4
P12004	Proliferating cell nuclear antigen OS=Homo sapiens GN=PCNA PE=1 SV=1	1.03485	355.3	23.5	370.6	21.4	2
P46777	60S ribosomal protein L5 OS=Homo sapiens GN=RPL5 PE=1 SV=3	1.03471	4887.9	4606.6	5240.1	4584	18
Q9ULW0	Targeting protein for Xklp2 OS=Homo sapiens GN=TPX2 PE=1 SV=2	1.03445	2547.9	2241.7	2730.6	2224	18
P05455	Lupus La protein OS=Homo sapiens GN=SSB PE=1 SV=2	1.03438	928.3	464.9	996.4	444.7	2
Q3MHD2	Protein LSM12 homolog OS=Homo sapiens GN=LSM12 PE=1 SV=2	1.03419	462.2	535.1	472.2	559.2	3
Q9H8H0	Nucleolar protein 11 OS=Homo sapiens GN=NOL11 PE=1 SV=1	1.03402	910.6	1282.4	961.8	1305.8	6
Q13155	Aminoacyl tRNA synthase complex-interacting multifunctional protein 2 OS=Homo sapiens GN=AIMP2 PE=1 SV=2	1.03385	413	53.8	421.3	61.3	3
Q8WWM7	Ataxin-2-like protein OS=Homo sapiens GN=ATXN2L PE=1 SV=2	1.03375	2827	2227.7	2918.8	2306.5	15
Q9UJV9	Probable ATP-dependent RNA helicase DDX41 OS=Homo sapiens GN=DDX41 PE=1 SV=2	1.03306	1194	663.3	1241.5	677.2	9
P60709	Actin, cytoplasmic 1 OS=Homo sapiens GN=ACTB PE=1 SV=1	1.03304	2965.2	2860.8	2957.6	3060.9	12
Q14247	Src substrate cortactin OS=Homo sapiens GN=CTTN PE=1 SV=2	1.03266	1168.9	680.6	1202.8	707.1	3
Q06787	Synaptic functional regulator FMR1 OS=Homo sapiens GN=FMR1 PE=1 SV=1	1.03213	547.8	684.7	535.4	736.7	3
O75643	U5 small nuclear ribonucleoprotein 200 kDa helicase OS=Homo sapiens GN=SNRNP200 PE=1 SV=2	1.03087	3702.1	4353	3912.8	4391	28
O95793	Double-stranded RNA-binding protein Staufen homolog 1 OS=Homo sapiens GN=STAU1 PE=1 SV=2	1.02986	1469.8	1598.2	1535.9	1623.7	7
Q53F19	Nuclear cap-binding protein subunit 3 OS=Homo sapiens GN=NCBP3 PE=1 SV=2	1.02966	565.8	445.5	602.6	438.7	6
Q96FV9	THO complex subunit 1 OS=Homo sapiens GN=THOC1 PE=1 SV=1	1.02888	700.8	227.1	727.5	227.2	4
Q9NYB0	Telomeric repeat-binding factor 2-interacting protein 1 OS=Homo sapiens GN=TERF2IP PE=1 SV=1	1.02847	180.8	662.2	184	683	4
Q13813	Spectrin alpha chain, non-erythrocytic 1 OS=Homo sapiens GN=SPTAN1 PE=1 SV=3	1.02804	2061.9	1329.9	2140.4	1346.5	15
P06753	Tropomyosin alpha-3 chain OS=Homo sapiens GN=TPM3 PE=1 SV=2	1.02677	884.7	579.6	934.7	568.8	7
Q13595	Transformer-2 protein homolog alpha OS=Homo sapiens GN=TRA2A PE=1 SV=1	1.02647	555.1	959.8	534.2	1020.8	7
Q9HD42	Charged multivesicular body protein 1a OS=Homo sapiens GN=CHMP1A PE=1 SV=1	1.02617	580	703.8	616.3	701.1	3
Q8WW12	PEST proteolytic signal-containing nuclear protein OS=Homo sapiens GN=PCNP PE=1 SV=2	1.02603	1124.8	1049.7	1095.4	1135.7	6
Q8NC51	Plasminogen activator inhibitor 1 RNA-binding protein OS=Homo sapiens GN=SERBP1 PE=1 SV=2	1.02597	3300.9	3510.7	3381.7	3606.8	15
Q9NX24	H/ACA ribonucleoprotein complex subunit 2 OS=Homo sapiens GN=NHP2 PE=1 SV=1	1.02569	966.6	1057.2	984.1	1091.7	5
O00488	Zinc finger protein 593 OS=Homo sapiens GN=ZNF593 PE=1 SV=2	1.02534	263.3	387.8	259.3	408.3	2
Q9H6R4	Nucleolar protein 6 OS=Homo sapiens GN=NOL6 PE=1 SV=2	1.02488	289.6	245	304.2	243.7	3
P55769	NHP2-like protein 1 OS=Homo sapiens GN=SNU13 PE=1 SV=3	1.02468	967.2	917.1	976.4	954.4	5
Q13310	Polyadenylate-binding protein 4 OS=Homo sapiens GN=PABPC4 PE=1 SV=1	1.02429	768.6	1149.6	780	1184.8	11
Q9NP66	High mobility group protein 20A OS=Homo sapiens GN=HMG20A PE=1 SV=1	1.02429	593.2	382.6	577.7	421.8	2
A8MWD9	Putative small nuclear ribonucleoprotein G-like protein 15 OS=Homo sapiens GN=SNRPGP15 PE=5 SV=2	1.0236	741.9	897.7	745.8	932.5	3
Q01082	Spectrin beta chain, non-erythrocytic 1 OS=Homo sapiens GN=SPTBN1 PE=1 SV=2	1.02329	900.8	601.8	880.2	657.4	8
P62263	40S ribosomal protein S14 OS=Homo sapiens GN=RPS14 PE=1 SV=3	1.02302	757.3	1041.1	765.9	1073.9	6
O75367	Core histone macro-H2A.1 OS=Homo sapiens GN=H2AFY PE=1 SV=4	1.023	1189.9	1775.7	1213.4	1820.4	9
Q6P1J9	Parafibromin OS=Homo sapiens GN=CDC73 PE=1 SV=1	1.02294	796.5	794.5	826.5	801	3
P62750	60S ribosomal protein L23a OS=Homo sapiens GN=RPL23A PE=1 SV=1	1.02231	1716	1434.7	1791.1	1429.9	8
Q07020	60S ribosomal protein L18 OS=Homo sapiens GN=RPL18 PE=1 SV=2	1.0222	1456.6	1327.8	1437.8	1408.4	7
Q9H9Y6	DNA-directed RNA polymerase I subunit RPA2 OS=Homo sapiens GN=POLR1B PE=1 SV=2	1.02153	595.7	370.3	589.9	396.9	3
O15042	U2 snRNP-associated SURP motif-containing protein OS=Homo sapiens GN=U2SURP PE=1 SV=2	1.02084	369.7	892.4	384.6	903.8	4
P08621	U1 small nuclear ribonucleoprotein 70 kDa OS=Homo sapiens GN=SNRNP70 PE=1 SV=2	1.01988	1225.2	1431.1	1227.4	1481.7	10
P36873	Serine/threonine-protein phosphatase PP1-gamma catalytic subunit OS=Homo sapiens GN=PPP1CC PE=1 SV=1	1.01912	483	494.9	477.4	519.2	3
Q15637	Splicing factor 1 OS=Homo sapiens GN=SF1 PE=1 SV=4	1.0187	675.6	308.3	698.5	303.8	5
Q9Y5B9	FACT complex subunit SPT16 OS=Homo sapiens GN=SUPT16H PE=1 SV=1	1.01861	2216.8	1796.8	2218.2	1870.1	15
Q92922	SWI/SNF complex subunit SMARCC1 OS=Homo sapiens GN=SMARCC1 PE=1 SV=3	1.018	207.1	509.6	204.3	525.3	4
Q14966	Zinc finger protein 638 OS=Homo sapiens GN=ZNF638 PE=1 SV=2	1.01664	670.8	687.5	677.5	703.4	6
Q92841	Probable ATP-dependent RNA helicase DDX17 OS=Homo sapiens GN=DDX17 PE=1 SV=2	1.01427	4946	4306	5049	4335	27
O60264	SWI/SNF-related matrix-associated actin-dependent regulator of chromatin subfamily A member 5 OS=Homo sapiens GN=SMARCA5 PE=1 SV=1	1.01392	461.9	400.3	475.7	398.5	4
O95602	DNA-directed RNA polymerase I subunit RPA1 OS=Homo sapiens GN=POLR1A PE=1 SV=2	1.01365	677.5	817.3	714.5	800.7	5
O75934	Pre-mRNA-splicing factor SPF27 OS=Homo sapiens GN=BCAS2 PE=1 SV=1	1.01324	1348.2	1468.5	1371.9	1482.1	9
Q8IV63	Inactive serine/threonine-protein kinase VRK3 OS=Homo sapiens GN=VRK3 PE=1 SV=2	1.012	139.6	118.7	148.5	112.9	2
Q13242	Serine/arginine-rich splicing factor 9 OS=Homo sapiens GN=SRSF9 PE=1 SV=1	1.0116	2332.5	2726	2351.7	2765.5	14
Q9Y2X3	Nucleolar protein 58 OS=Homo sapiens GN=NOP58 PE=1 SV=1	1.01134	1152.1	1007.7	1174.3	1010	5
Q7L2E3	Putative ATP-dependent RNA helicase DHX30 OS=Homo sapiens GN=DHX30 PE=1 SV=1	1.01092	1651.1	1133.9	1659.1	1156.3	9
O75940	Survival of motor neuron-related-splicing factor 30 OS=Homo sapiens GN=SMNDC1 PE=1 SV=1	1.00985	556.2	743.9	578.9	734	5
Q7Z2W4	Zinc finger CCCH-type antiviral protein 1 OS=Homo sapiens GN=ZC3HAV1 PE=1 SV=3	1.00906	667.5	458.3	693.1	442.9	6
P35222	Catenin beta-1 OS=Homo sapiens GN=CTNNB1 PE=1 SV=1	1.00749	500.8	420.9	501.9	426.7	5
P61964	WD repeat-containing protein 5 OS=Homo sapiens GN=WDR5 PE=1 SV=1	1.00714	337.5	460.6	356	447.8	4
P18583	Protein SON OS=Homo sapiens GN=SON PE=1 SV=4	1.00685	832.7	627.8	829.1	641.4	6
Q9Y5J1	U3 small nucleolar RNA-associated protein 18 homolog OS=Homo sapiens GN=UTP18 PE=1 SV=3	1.00679	917.2	1468.1	901.7	1499.8	5
Q8WXF1	Paraspeckle component 1 OS=Homo sapiens GN=PSPC1 PE=1 SV=1	1.00636	2235.5	1459.8	2346.6	1372.2	12
Q9H5H4	Zinc finger protein 768 OS=Homo sapiens GN=ZNF768 PE=1 SV=2	1.00623	432.7	466.4	431.3	473.4	3
Q96PK6	RNA-binding protein 14 OS=Homo sapiens GN=RBM14 PE=1 SV=2	1.00606	1785	2820.6	1967.3	2666.2	12
O75122	CLIP-associating protein 2 OS=Homo sapiens GN=CLASP2 PE=1 SV=2	1.00588	444.2	235.8	448.3	235.7	3
Q92878	DNA repair protein RAD50 OS=Homo sapiens GN=RAD50 PE=1 SV=1	1.00336	323.8	122.1	328.8	118.6	2
Q07157	Tight junction protein ZO-1 OS=Homo sapiens GN=TJP1 PE=1 SV=3	1.00259	565.6	206.5	569.8	204.3	4
Q96CS2	HAUS augmin-like complex subunit 1 OS=Homo sapiens GN=HAUS1 PE=1 SV=1	1.0024	123.9	126.4	127.6	123.3	2
O00567	Nucleolar protein 56 OS=Homo sapiens GN=NOP56 PE=1 SV=4	1.00016	218.2	1043.7	251.4	1010.7	4
P61978	Heterogeneous nuclear ribonucleoprotein K OS=Homo sapiens GN=HNRNPK PE=1 SV=1	0.997958	3913.2	3578.8	3976	3500.7	13
P09874	Poly [ADP-ribose] polymerase 1 OS=Homo sapiens GN=PARP1 PE=1 SV=4	0.997832	5325.8	5652	5354.1	5599.9	25
Q13769	THO complex subunit 5 homolog OS=Homo sapiens GN=THOC5 PE=1 SV=2	0.997041	263.3	243.7	256.5	249	2
Q9NVX2	Notchless protein homolog 1 OS=Homo sapiens GN=NLE1 PE=1 SV=4	0.996544	1618.8	985.3	1637.9	957.2	7
P09497	Clathrin light chain B OS=Homo sapiens GN=CLTB PE=1 SV=1	0.996302	936.4	929.7	900.6	958.6	3
Q7L4I2	Arginine/serine-rich coiled-coil protein 2 OS=Homo sapiens GN=RSRC2 PE=1 SV=1	0.996087	445.7	244.3	451.9	235.4	2
Q12788	Transducin beta-like protein 3 OS=Homo sapiens GN=TBL3 PE=1 SV=2	0.995896	1243.6	364.6	1276.2	325.4	9
P46013	Proliferation marker protein Ki-67 OS=Homo sapiens GN=MKI67 PE=1 SV=2	0.995831	8884	8674.1	8692.8	8792.1	49
O15160	DNA-directed RNA polymerases I and III subunit RPAC1 OS=Homo sapiens GN=POLR1C PE=1 SV=1	0.995773	344.2	223.6	349.5	215.9	6
Q9Y6K9	NF-kappa-B essential modulator OS=Homo sapiens GN=IKBKG PE=1 SV=2	0.995311	197.8	228.7	196.8	227.7	2
Q13428	Treacle protein OS=Homo sapiens GN=TCOF1 PE=1 SV=3	0.994043	7839.2	8763.8	7829.3	8674.8	33
Q8N3X1	Formin-binding protein 4 OS=Homo sapiens GN=FNBP4 PE=1 SV=3	0.993948	1028	954.7	1026.8	943.9	8
Q13283	Ras GTPase-activating protein-binding protein 1 OS=Homo sapiens GN=G3BP1 PE=1 SV=1	0.993693	1448	1532.8	1445.1	1516.9	11
Q2TAY7	WD40 repeat-containing protein SMU1 OS=Homo sapiens GN=SMU1 PE=1 SV=2	0.993553	520.8	658.1	430.8	740.5	5
P18621	60S ribosomal protein L17 OS=Homo sapiens GN=RPL17 PE=1 SV=3	0.992271	1175.8	1489.6	1196.6	1448.2	6
P18124	60S ribosomal protein L7 OS=Homo sapiens GN=RPL7 PE=1 SV=1	0.992061	1839.3	2392.9	1826.3	2372.3	11
Q9NUP9	Protein lin-7 homolog C OS=Homo sapiens GN=LIN7C PE=1 SV=1	0.992037	354.9	473.9	351.5	470.7	3
P14678	Small nuclear ribonucleoprotein-associated proteins B and B' OS=Homo sapiens GN=SNRPB PE=1 SV=2	0.991812	954.4	1524.7	992.8	1466	7
P07197	Neurofilament medium polypeptide OS=Homo sapiens GN=NEFM PE=1 SV=3	0.991731	2636.5	2708.8	2587.5	2713.6	24
Q9UQE7	Structural maintenance of chromosomes protein 3 OS=Homo sapiens GN=SMC3 PE=1 SV=2	0.991576	1958	1662.5	1910.8	1679.2	11
P29590	Protein PML OS=Homo sapiens GN=PML PE=1 SV=3	0.991019	704.7	753.9	684	761.5	6
P46779	60S ribosomal protein L28 OS=Homo sapiens GN=RPL28 PE=1 SV=3	0.991005	1891.5	1176.8	1814.7	1226	8
Q9UBU9	Nuclear RNA export factor 1 OS=Homo sapiens GN=NXF1 PE=1 SV=1	0.99091	1082.6	919.7	1078.6	905.5	7
Streptavidin	(S.avidinii)	0.990903	108.5	45.4	109.7	42.8	3
O94776	Metastasis-associated protein MTA2 OS=Homo sapiens GN=MTA2 PE=1 SV=1	0.990415	34.5	153.3	37.1	148.9	2
Q9BV38	WD repeat-containing protein 18 OS=Homo sapiens GN=WDR18 PE=1 SV=2	0.990104	925.2	1186.7	977.6	1113.4	6
Q13123	Protein Red OS=Homo sapiens GN=IK PE=1 SV=3	0.989148	2856.7	3179.2	2835.8	3134.6	12
P98175	RNA-binding protein 10 OS=Homo sapiens GN=RBM10 PE=1 SV=3	0.988785	2485.3	2284.9	2026.7	2690	13
Q9Y3B9	RRP15-like protein OS=Homo sapiens GN=RRP15 PE=1 SV=2	0.988645	2527.4	1920.1	2521.9	1875.1	13
Q8TDI0	Chromodomain-helicase-DNA-binding protein 5 OS=Homo sapiens GN=CHD5 PE=1 SV=1	0.98811	151	261.1	154.9	252.3	2
P51610	Host cell factor 1 OS=Homo sapiens GN=HCFC1 PE=1 SV=2	0.987796	424.8	509.3	420.2	502.5	4
O95785	Protein Wiz OS=Homo sapiens GN=WIZ PE=1 SV=2	0.986468	220.2	792.2	245.6	753.1	5
Q6WCQ1	Myosin phosphatase Rho-interacting protein OS=Homo sapiens GN=MPRIP PE=1 SV=3	0.98559	235.5	659.7	241.6	640.7	7
P46776	60S ribosomal protein L27a OS=Homo sapiens GN=RPL27A PE=1 SV=2	0.985528	625.9	763	640.1	728.7	3
Q8N4Q1	Mitochondrial intermembrane space import and assembly protein 40 OS=Homo sapiens GN=CHCHD4 PE=1 SV=1	0.985192	70.5	334.7	62.1	337.1	2
Q9H0G5	Nuclear speckle splicing regulatory protein 1 OS=Homo sapiens GN=NSRP1 PE=1 SV=1	0.985119	388.8	780.5	416.2	735.7	4
P14868	Aspartate--tRNA ligase, cytoplasmic OS=Homo sapiens GN=DARS PE=1 SV=2	0.984421	350.7	1202.7	351.7	1177.5	8
P18077	60S ribosomal protein L35a OS=Homo sapiens GN=RPL35A PE=1 SV=2	0.98253	982.5	1375.8	956	1361.1	7
Q9BU76	Multiple myeloma tumor-associated protein 2 OS=Homo sapiens GN=MMTAG2 PE=1 SV=1	0.982312	397.9	478.4	408.5	452.3	6
P38919	Eukaryotic initiation factor 4A-III OS=Homo sapiens GN=EIF4A3 PE=1 SV=4	0.981572	1968.3	2964.5	1929.9	2912	12
Q15029	116 kDa U5 small nuclear ribonucleoprotein component OS=Homo sapiens GN=EFTUD2 PE=1 SV=1	0.981539	3521.3	3260.4	3486	3170.5	23
P51114	Fragile X mental retardation syndrome-related protein 1 OS=Homo sapiens GN=FXR1 PE=1 SV=3	0.980624	348.9	430.4	331.3	432.9	4
P56537	Eukaryotic translation initiation factor 6 OS=Homo sapiens GN=EIF6 PE=1 SV=1	0.980589	79.5	80.2	81.8	74.8	2
Q92499	ATP-dependent RNA helicase DDX1 OS=Homo sapiens GN=DDX1 PE=1 SV=2	0.979862	2298.9	1966.6	2298.4	1881.2	10
P52597	Heterogeneous nuclear ribonucleoprotein F OS=Homo sapiens GN=HNRNPF PE=1 SV=3	0.979805	692.7	773	668.9	767.2	6
Q6PKG0	La-related protein 1 OS=Homo sapiens GN=LARP1 PE=1 SV=2	0.979627	1896.9	1794.3	1856.5	1759.5	10
O43143	Pre-mRNA-splicing factor ATP-dependent RNA helicase DHX15 OS=Homo sapiens GN=DHX15 PE=1 SV=2	0.978154	3450.4	3676.6	3317.5	3653.8	19
Q9UN37	Vacuolar protein sorting-associated protein 4A OS=Homo sapiens GN=VPS4A PE=1 SV=1	0.977583	238.6	229.8	241.5	216.4	2
P26368	Splicing factor U2AF 65 kDa subunit OS=Homo sapiens GN=U2AF2 PE=1 SV=4	0.976823	380.8	352.7	385.4	331.1	3
P78362	SRSF protein kinase 2 OS=Homo sapiens GN=SRPK2 PE=1 SV=3	0.975921	350.9	197.3	359.2	175.8	3
Q969X6	U3 small nucleolar RNA-associated protein 4 homolog OS=Homo sapiens GN=UTP4 PE=1 SV=1	0.975894	1307.3	845.7	1307	794.1	6
P62424	60S ribosomal protein L7a OS=Homo sapiens GN=RPL7A PE=1 SV=2	0.974507	4688.7	4619.7	4537.9	4533.2	16
Q15773	Myeloid leukemia factor 2 OS=Homo sapiens GN=MLF2 PE=1 SV=1	0.974183	186.8	177.3	181.2	173.5	2
O75533	Splicing factor 3B subunit 1 OS=Homo sapiens GN=SF3B1 PE=1 SV=3	0.974146	2947.5	4057.2	2902.1	3921.5	18
Q9UER7	Death domain-associated protein 6 OS=Homo sapiens GN=DAXX PE=1 SV=2	0.973538	1588.4	1533.1	1529.5	1509.4	11
P08865	40S ribosomal protein SA OS=Homo sapiens GN=RPSA PE=1 SV=4	0.972889	590.9	441.9	579.5	425.3	7
Q9Y224	UPF0568 protein C14orf166 OS=Homo sapiens GN=C14orf166 PE=1 SV=1	0.971963	1394.6	1562.2	1392.1	1481.8	6
Q14103	Heterogeneous nuclear ribonucleoprotein D0 OS=Homo sapiens GN=HNRNPD PE=1 SV=1	0.971226	2214.8	2664.6	2156.2	2582.8	15
P78527	DNA-dependent protein kinase catalytic subunit OS=Homo sapiens GN=PRKDC PE=1 SV=3	0.970408	1751.9	1492.2	1640.9	1507.2	13
Q9H875	PRKR-interacting protein 1 OS=Homo sapiens GN=PRKRIP1 PE=1 SV=1	0.970022	202.8	878	199.2	849.2	3
Q15056	Eukaryotic translation initiation factor 4H OS=Homo sapiens GN=EIF4H PE=1 SV=5	0.96988	68	64.8	67.2	61.6	2
Q12797	Aspartyl/asparaginyl beta-hydroxylase OS=Homo sapiens GN=ASPH PE=1 SV=3	0.96783	140	627.8	123.9	619.2	2
Q9NR30	Nucleolar RNA helicase 2 OS=Homo sapiens GN=DDX21 PE=1 SV=5	0.967528	6238.5	5279.2	6144.9	4998.8	27
P11021	78 kDa glucose-regulated protein OS=Homo sapiens GN=HSPA5 PE=1 SV=2	0.966698	2938.4	3007.1	2845.5	2902	19
Q9HAF1	Chromatin modification-related protein MEAF6 OS=Homo sapiens GN=MEAF6 PE=1 SV=1	0.965405	504.1	386.2	488	371.5	4
Q8IWC1	MAP7 domain-containing protein 3 OS=Homo sapiens GN=MAP7D3 PE=1 SV=2	0.961198	582.7	638.9	577.3	596.9	4
O60884	DnaJ homolog subfamily A member 2 OS=Homo sapiens GN=DNAJA2 PE=1 SV=1	0.960861	307.6	407.8	299.7	387.7	4
Q9H444	Charged multivesicular body protein 4b OS=Homo sapiens GN=CHMP4B PE=1 SV=1	0.958953	430.3	673.3	366.7	691.6	6
Q9NNW5	WD repeat-containing protein 6 OS=Homo sapiens GN=WDR6 PE=1 SV=1	0.958374	306.3	308.7	283.8	305.6	2
Q14444	Caprin-1 OS=Homo sapiens GN=CAPRIN1 PE=1 SV=2	0.958211	4058.1	4417.8	3854.5	4267.2	13
P02545	Prelamin-A/C OS=Homo sapiens GN=LMNA PE=1 SV=1	0.958189	5118.7	5304.4	4501.3	5486	36
Q9NPE3	H/ACA ribonucleoprotein complex subunit 3 OS=Homo sapiens GN=NOP10 PE=1 SV=1	0.957615	398.4	257.5	406.7	221.4	3
P40429	60S ribosomal protein L13a OS=Homo sapiens GN=RPL13A PE=1 SV=2	0.956712	2419.2	3242.9	2373.3	3043.7	12
P23396	40S ribosomal protein S3 OS=Homo sapiens GN=RPS3 PE=1 SV=2	0.956409	1819.5	1777.6	1750.1	1690.2	11
Q8NDD1	Uncharacterized protein C1orf131 OS=Homo sapiens GN=C1orf131 PE=1 SV=3	0.955571	1084.8	1060.2	1027.5	1022.2	4
Q9H814	Phosphorylated adapter RNA export protein OS=Homo sapiens GN=PHAX PE=1 SV=1	0.955467	543.1	635.8	533.3	593.1	5
Q99547	M-phase phosphoprotein 6 OS=Homo sapiens GN=MPHOSPH6 PE=1 SV=2	0.95411	729.3	889.8	712.9	831.9	6
Q9NPA8	Transcription and mRNA export factor ENY2 OS=Homo sapiens GN=ENY2 PE=1 SV=1	0.953776	687	483.4	676.6	439.7	3
P13984	General transcription factor IIF subunit 2 OS=Homo sapiens GN=GTF2F2 PE=1 SV=2	0.9533	487.5	424.7	475.7	393.9	2
Q8N5I9	Uncharacterized protein C12orf45 OS=Homo sapiens GN=C12orf45 PE=1 SV=2	0.952023	208.3	417	199.9	395.4	2
Q15366	Poly(rC)-binding protein 2 OS=Homo sapiens GN=PCBP2 PE=1 SV=1	0.951828	424.4	264.8	402.3	253.7	5
Q04637	Eukaryotic translation initiation factor 4 gamma 1 OS=Homo sapiens GN=EIF4G1 PE=1 SV=4	0.951314	394.2	614.3	367.7	591.7	7
Q6P2Q9	Pre-mRNA-processing-splicing factor 8 OS=Homo sapiens GN=PRPF8 PE=1 SV=2	0.951024	3799.6	3712.2	3561.6	3582.3	28
Q96EY1	DnaJ homolog subfamily A member 3, mitochondrial OS=Homo sapiens GN=DNAJA3 PE=1 SV=2	0.950995	128.7	132.5	119.3	129.1	2
P63167	Dynein light chain 1, cytoplasmic OS=Homo sapiens GN=DYNLL1 PE=1 SV=1	0.950239	784.6	700.5	766.3	644.9	3
Q96SB4	SRSF protein kinase 1 OS=Homo sapiens GN=SRPK1 PE=1 SV=2	0.949264	76.4	290.2	75.7	272.3	3
P16403	Histone H1.2 OS=Homo sapiens GN=HIST1H1C PE=1 SV=2	0.949201	2953.3	2796.8	2938.4	2519.6	9
P07814	Bifunctional glutamate/proline--tRNA ligase OS=Homo sapiens GN=EPRS PE=1 SV=5	0.948256	3607.5	2360.3	3437.4	2221.6	16
P30876	DNA-directed RNA polymerase II subunit RPB2 OS=Homo sapiens GN=POLR2B PE=1 SV=1	0.947639	397.7	263.1	403.9	222.3	2
Q15291	Retinoblastoma-binding protein 5 OS=Homo sapiens GN=RBBP5 PE=1 SV=2	0.94761	191.8	222.4	184.4	208.1	2
Q01130	Serine/arginine-rich splicing factor 2 OS=Homo sapiens GN=SRSF2 PE=1 SV=4	0.94729	1340.3	1293	1267.8	1226.7	6
P17844	Probable ATP-dependent RNA helicase DDX5 OS=Homo sapiens GN=DDX5 PE=1 SV=1	0.947179	2602.1	2659.1	2535	2448.3	26
O94906	Pre-mRNA-processing factor 6 OS=Homo sapiens GN=PRPF6 PE=1 SV=1	0.946782	717.4	628	710.4	563.4	7
Q9UKF6	Cleavage and polyadenylation specificity factor subunit 3 OS=Homo sapiens GN=CPSF3 PE=1 SV=1	0.946708	188.1	130.9	178.2	123.8	2
P46778	60S ribosomal protein L21 OS=Homo sapiens GN=RPL21 PE=1 SV=2	0.945923	938.3	372.8	903.1	337.1	6
O95926	Pre-mRNA-splicing factor SYF2 OS=Homo sapiens GN=SYF2 PE=1 SV=1	0.945481	419.9	271.6	405.3	248.5	3
Q9H6P5	Threonine aspartase 1 OS=Homo sapiens GN=TASP1 PE=1 SV=1	0.945342	204	427.2	205.4	391.3	2
P48681	Nestin OS=Homo sapiens GN=NES PE=1 SV=2	0.944987	957.4	1089.4	918.7	1015.5	8
O43447	Peptidyl-prolyl cis-trans isomerase H OS=Homo sapiens GN=PPIH PE=1 SV=1	0.944948	146	151.9	136.7	144.8	2
P60660	Myosin light polypeptide 6 OS=Homo sapiens GN=MYL6 PE=1 SV=2	0.944526	1808.7	1675.8	1736.2	1555	9
P25205	DNA replication licensing factor MCM3 OS=Homo sapiens GN=MCM3 PE=1 SV=3	0.944395	867.8	707.6	872.4	615.4	7
P62244	40S ribosomal protein S15a OS=Homo sapiens GN=RPS15A PE=1 SV=2	0.944151	1138	507.5	1093.2	460.4	6
Q9NQZ2	Something about silencing protein 10 OS=Homo sapiens GN=UTP3 PE=1 SV=1	0.942836	480.6	483.3	457.3	451.5	2
Q14498	RNA-binding protein 39 OS=Homo sapiens GN=RBM39 PE=1 SV=2	0.942778	796.3	573.8	742.4	549.3	6
Q9P2I0	Cleavage and polyadenylation specificity factor subunit 2 OS=Homo sapiens GN=CPSF2 PE=1 SV=2	0.942348	411.2	789.1	385.6	745.5	5
P12268	Inosine-5'-monophosphate dehydrogenase 2 OS=Homo sapiens GN=IMPDH2 PE=1 SV=2	0.941388	395	326.7	357.4	322	2
P49207	60S ribosomal protein L34 OS=Homo sapiens GN=RPL34 PE=1 SV=3	0.94102	2247.1	2301.9	1998	2282.7	8
O43395	U4/U6 small nuclear ribonucleoprotein Prp3 OS=Homo sapiens GN=PRPF3 PE=1 SV=2	0.940705	326.2	147.7	313	132.8	2
O95782	AP-2 complex subunit alpha-1 OS=Homo sapiens GN=AP2A1 PE=1 SV=3	0.939914	1086.8	870.4	982.2	857.4	9
P62888	60S ribosomal protein L30 OS=Homo sapiens GN=RPL30 PE=1 SV=2	0.939755	616.7	475.5	576.4	450	4
P13646-1	SWISS-PROT:P13646-1 Tax_Id=9606 Gene_Symbol=KRT13 Isoform 1 of Keratin, type I cytoskeletal 13	0.939445	868.4	561.7	773.4	570.1	12
Q13838	Spliceosome RNA helicase DDX39B OS=Homo sapiens GN=DDX39B PE=1 SV=1	0.939297	1197.2	1091	1092.6	1056.7	9
O75190	DnaJ homolog subfamily B member 6 OS=Homo sapiens GN=DNAJB6 PE=1 SV=2	0.938765	613.1	701.5	579.3	654.8	2
Q13243	Serine/arginine-rich splicing factor 5 OS=Homo sapiens GN=SRSF5 PE=1 SV=1	0.938628	767.8	395.6	712.8	379.2	5
P17987	T-complex protein 1 subunit alpha OS=Homo sapiens GN=TCP1 PE=1 SV=1	0.93861	474.6	217.7	461.8	188	2
Q15046	Lysine--tRNA ligase OS=Homo sapiens GN=KARS PE=1 SV=3	0.938228	753.2	1074.5	701	1013.8	8
P78318	Immunoglobulin-binding protein 1 OS=Homo sapiens GN=IGBP1 PE=1 SV=1	0.938026	172.1	89.3	142.9	102.3	3
P55265	Double-stranded RNA-specific adenosine deaminase OS=Homo sapiens GN=ADAR PE=1 SV=4	0.937897	1909.9	2073.8	1733.3	2003	10
P09661	U2 small nuclear ribonucleoprotein A' OS=Homo sapiens GN=SNRPA1 PE=1 SV=2	0.937382	1055.9	632.1	985.9	596.4	5
P63220	40S ribosomal protein S21 OS=Homo sapiens GN=RPS21 PE=1 SV=1	0.93728	592.3	1451.7	511.3	1404.5	7
Q99459	Cell division cycle 5-like protein OS=Homo sapiens GN=CDC5L PE=1 SV=2	0.936779	238.1	775.8	208.1	741.7	5
P62277	40S ribosomal protein S13 OS=Homo sapiens GN=RPS13 PE=1 SV=2	0.936396	1223.6	1301.4	1054.6	1309.8	7
O14893	Gem-associated protein 2 OS=Homo sapiens GN=GEMIN2 PE=1 SV=1	0.936297	786.4	839.9	723.5	799.2	4
O95229	ZW10 interactor OS=Homo sapiens GN=ZWINT PE=1 SV=2	0.934737	314.9	648.9	284.1	616.8	2
P50914	60S ribosomal protein L14 OS=Homo sapiens GN=RPL14 PE=1 SV=4	0.934313	429.7	768.4	356.8	762.6	5
O00233	26S proteasome non-ATPase regulatory subunit 9 OS=Homo sapiens GN=PSMD9 PE=1 SV=3	0.933969	1216.2	1166	1158.9	1066	4
P17480	Nucleolar transcription factor 1 OS=Homo sapiens GN=UBTF PE=1 SV=1	0.933313	659.6	664.5	626.8	609	5
O75821	Eukaryotic translation initiation factor 3 subunit G OS=Homo sapiens GN=EIF3G PE=1 SV=2	0.93227	431.6	684.6	427.5	613.1	4
P62906	60S ribosomal protein L10a OS=Homo sapiens GN=RPL10A PE=1 SV=2	0.931914	1321.5	1012.3	1217.7	957.2	7
Q9NTJ3	Structural maintenance of chromosomes protein 4 OS=Homo sapiens GN=SMC4 PE=1 SV=2	0.931644	663.7	575.4	622.8	531.6	6
Q02878	60S ribosomal protein L6 OS=Homo sapiens GN=RPL6 PE=1 SV=3	0.931457	2937.9	2238.4	2701.7	2119.8	11
Q15365	Poly(rC)-binding protein 1 OS=Homo sapiens GN=PCBP1 PE=1 SV=2	0.930982	753.4	1427.2	714.8	1315.3	8
O15381	Nuclear valosin-containing protein-like OS=Homo sapiens GN=NVL PE=1 SV=1	0.930534	385.7	185.8	366.2	165.6	4
P25398	40S ribosomal protein S12 OS=Homo sapiens GN=RPS12 PE=1 SV=3	0.929306	1222.9	1647.2	1157.9	1509.3	6
P62701	40S ribosomal protein S4, X isoform OS=Homo sapiens GN=RPS4X PE=1 SV=2	0.928908	1620.2	1968.1	1569.5	1763.7	9
Q8NI36	WD repeat-containing protein 36 OS=Homo sapiens GN=WDR36 PE=1 SV=1	0.928418	269.4	430.5	252.2	397.6	4
Q96J01	THO complex subunit 3 OS=Homo sapiens GN=THOC3 PE=1 SV=1	0.928341	323.5	731.5	331.8	647.6	3
P07437	Tubulin beta chain OS=Homo sapiens GN=TUBB PE=1 SV=2	0.928258	476.4	412.9	436.3	389.2	13
P52701	DNA mismatch repair protein Msh6 OS=Homo sapiens GN=MSH6 PE=1 SV=2	0.927704	361	322.3	317.5	316.4	6
Q15269	Periodic tryptophan protein 2 homolog OS=Homo sapiens GN=PWP2 PE=2 SV=2	0.927121	525.3	243.1	476.2	236.2	2
Q8N954	G patch domain-containing protein 11 OS=Homo sapiens GN=GPATCH11 PE=1 SV=3	0.926859	390	260.8	357.5	245.7	2
P39023	60S ribosomal protein L3 OS=Homo sapiens GN=RPL3 PE=1 SV=2	0.926762	3619.4	3961.4	3454.7	3570.9	11
Q05519	Serine/arginine-rich splicing factor 11 OS=Homo sapiens GN=SRSF11 PE=1 SV=1	0.924638	19.8	49.2	20.4	43.4	2
P61962	DDB1- and CUL4-associated factor 7 OS=Homo sapiens GN=DCAF7 PE=1 SV=1	0.924312	87.5	43.3	81.3	39.6	3
Q14145	Kelch-like ECH-associated protein 1 OS=Homo sapiens GN=KEAP1 PE=1 SV=2	0.924264	51.5	155.8	42.9	148.7	2
Q8TED0	U3 small nucleolar RNA-associated protein 15 homolog OS=Homo sapiens GN=UTP15 PE=1 SV=3	0.923989	552.3	738.3	495.3	697.2	8
Q92785	Zinc finger protein ubi-d4 OS=Homo sapiens GN=DPF2 PE=1 SV=2	0.922335	361.2	365	328.8	341	2
P52298	Nuclear cap-binding protein subunit 2 OS=Homo sapiens GN=NCBP2 PE=1 SV=1	0.918399	567.8	461.6	522.6	422.8	2
P62910	60S ribosomal protein L32 OS=Homo sapiens GN=RPL32 PE=1 SV=2	0.916064	513.3	495.8	459	465.4	2
Q99417	C-Myc-binding protein OS=Homo sapiens GN=MYCBP PE=1 SV=3	0.914225	241.3	181.9	228.9	158	3
O15392	Baculoviral IAP repeat-containing protein 5 OS=Homo sapiens GN=BIRC5 PE=1 SV=3	0.913824	634	691.2	588.5	622.5	3
P63244	Receptor of activated protein C kinase 1 OS=Homo sapiens GN=RACK1 PE=1 SV=3	0.913538	990.5	546.6	894.7	509.5	5
Q16531	DNA damage-binding protein 1 OS=Homo sapiens GN=DDB1 PE=1 SV=1	0.913329	564.9	1153.1	505	1064.1	12
Q9Y3Y2	Chromatin target of PRMT1 protein OS=Homo sapiens GN=CHTOP PE=1 SV=2	0.911882	1327.9	1740.7	1242.3	1555.9	5
O75607	Nucleoplasmin-3 OS=Homo sapiens GN=NPM3 PE=1 SV=3	0.911832	154.1	330.2	121.7	319.9	2
O95400	CD2 antigen cytoplasmic tail-binding protein 2 OS=Homo sapiens GN=CD2BP2 PE=1 SV=1	0.910199	1307.1	982.4	1190.4	893.5	7
Q9Y265	RuvB-like 1 OS=Homo sapiens GN=RUVBL1 PE=1 SV=1	0.909953	453.7	484.7	415.3	438.6	8
Q9BZE4	Nucleolar GTP-binding protein 1 OS=Homo sapiens GN=GTPBP4 PE=1 SV=3	0.909085	931.2	584.5	829.9	548	4
P32969	60S ribosomal protein L9 OS=Homo sapiens GN=RPL9 PE=1 SV=1	0.908799	514.3	389.2	458.1	363	3
P05386	60S acidic ribosomal protein P1 OS=Homo sapiens GN=RPLP1 PE=1 SV=1	0.908642	44.2	36.8	37.4	36.2	4
P55036	26S proteasome non-ATPase regulatory subunit 4 OS=Homo sapiens GN=PSMD4 PE=1 SV=1	0.908563	358.8	399.1	317.2	371.4	3
P0DMV9	Heat shock 70 kDa protein 1B OS=Homo sapiens GN=HSPA1B PE=1 SV=1	0.908326	4064.5	3748	3659.6	3436.7	18
Q5T9A4	ATPase family AAA domain-containing protein 3B OS=Homo sapiens GN=ATAD3B PE=1 SV=1	0.907632	103.9	151.6	97.7	134.2	2
O75400	Pre-mRNA-processing factor 40 homolog A OS=Homo sapiens GN=PRPF40A PE=1 SV=2	0.907498	650.3	982.1	552.5	928.9	6
P62851	40S ribosomal protein S25 OS=Homo sapiens GN=RPS25 PE=1 SV=1	0.907481	295	687.5	268	623.6	3
Q9NW64	Pre-mRNA-splicing factor RBM22 OS=Homo sapiens GN=RBM22 PE=1 SV=1	0.907107	1124.8	268.2	1024.2	239.4	7
P62249	40S ribosomal protein S16 OS=Homo sapiens GN=RPS16 PE=1 SV=2	0.906186	1004.2	1296.1	921.9	1162.6	8
P49411	Elongation factor Tu, mitochondrial OS=Homo sapiens GN=TUFM PE=1 SV=2	0.905901	445.7	323.7	423	274	3
P24928	DNA-directed RNA polymerase II subunit RPB1 OS=Homo sapiens GN=POLR2A PE=1 SV=2	0.905643	58.7	49.4	52.3	45.6	2
Q00577	Transcriptional activator protein Pur-alpha OS=Homo sapiens GN=PURA PE=1 SV=2	0.905346	849.5	1007.8	786.2	895.3	4
O95347	Structural maintenance of chromosomes protein 2 OS=Homo sapiens GN=SMC2 PE=1 SV=2	0.905333	419.9	872	358.4	811.2	5
Q92945	Far upstream element-binding protein 2 OS=Homo sapiens GN=KHSRP PE=1 SV=4	0.90404	703.1	430.7	674.5	350.5	3
P62241	40S ribosomal protein S8 OS=Homo sapiens GN=RPS8 PE=1 SV=2	0.903592	1051.8	1247.8	927.9	1150	8
Q8NE71	ATP-binding cassette sub-family F member 1 OS=Homo sapiens GN=ABCF1 PE=1 SV=2	0.902117	412.2	952.7	382.1	849.2	6
P62280	40S ribosomal protein S11 OS=Homo sapiens GN=RPS11 PE=1 SV=3	0.901374	2034.3	1802.4	1747.7	1710.6	9
P83881	60S ribosomal protein L36a OS=Homo sapiens GN=RPL36A PE=1 SV=2	0.899985	237.1	437.8	206.2	401.2	2
P35244	Replication protein A 14 kDa subunit OS=Homo sapiens GN=RPA3 PE=1 SV=1	0.899165	230.1	81.3	217.5	62.5	2
O43823	A-kinase anchor protein 8 OS=Homo sapiens GN=AKAP8 PE=1 SV=1	0.898244	788.3	128.6	681.3	142.3	4
Q9Y4W2	Ribosomal biogenesis protein LAS1L OS=Homo sapiens GN=LAS1L PE=1 SV=2	0.897997	198.8	125.7	169.1	122.3	2
P84098	60S ribosomal protein L19 OS=Homo sapiens GN=RPL19 PE=1 SV=1	0.897726	650.1	765.7	635.8	635.2	5
Q16891	MICOS complex subunit MIC60 OS=Homo sapiens GN=IMMT PE=1 SV=1	0.897191	408.3	168.5	376.7	140.8	2
Q9BWF3	RNA-binding protein 4 OS=Homo sapiens GN=RBM4 PE=1 SV=1	0.896911	1747.5	1363.4	1596.6	1193.6	5
O75937	DnaJ homolog subfamily C member 8 OS=Homo sapiens GN=DNAJC8 PE=1 SV=2	0.89648	532.7	333.8	486.2	290.6	4
Q12962	Transcription initiation factor TFIID subunit 10 OS=Homo sapiens GN=TAF10 PE=1 SV=1	0.895049	395	346.3	347.9	315.6	2
Q99848	Probable rRNA-processing protein EBP2 OS=Homo sapiens GN=EBNA1BP2 PE=1 SV=2	0.894704	516.5	433.2	458.2	391.5	3
P60842	Eukaryotic initiation factor 4A-I OS=Homo sapiens GN=EIF4A1 PE=1 SV=1	0.894045	572	600.2	533.2	514.8	6
Q8N1F7	Nuclear pore complex protein Nup93 OS=Homo sapiens GN=NUP93 PE=1 SV=2	0.893153	409.7	617	412.3	504.7	4
P12532	Creatine kinase U-type, mitochondrial OS=Homo sapiens GN=CKMT1A PE=1 SV=1	0.893002	2401.8	2168.4	2087.9	1993.3	14
Q9UHR5	SAP30-binding protein OS=Homo sapiens GN=SAP30BP PE=1 SV=1	0.892909	412.3	212.4	358.8	199	2
P62314	Small nuclear ribonucleoprotein Sm D1 OS=Homo sapiens GN=SNRPD1 PE=1 SV=1	0.892891	285.7	141.9	261	120.8	3
O60341	Lysine-specific histone demethylase 1A OS=Homo sapiens GN=KDM1A PE=1 SV=2	0.892442	279	211.9	256.8	181.3	2
P56192	Methionine--tRNA ligase, cytoplasmic OS=Homo sapiens GN=MARS PE=1 SV=2	0.89243	539.9	464.1	481.5	414.5	6
Q96G25	Mediator of RNA polymerase II transcription subunit 8 OS=Homo sapiens GN=MED8 PE=1 SV=2	0.892151	444.9	485.1	396.4	433.3	2
Q9BQ67	Glutamate-rich WD repeat-containing protein 1 OS=Homo sapiens GN=GRWD1 PE=1 SV=1	0.890291	405.8	521.2	345.2	480.1	4
Q9Y3B2	Exosome complex component CSL4 OS=Homo sapiens GN=EXOSC1 PE=1 SV=1	0.888632	238.8	150.9	224.5	121.8	4
P40939	Trifunctional enzyme subunit alpha, mitochondrial OS=Homo sapiens GN=HADHA PE=1 SV=2	0.88811	1170.5	641.1	1010.2	598.7	5
O60506	Heterogeneous nuclear ribonucleoprotein Q OS=Homo sapiens GN=SYNCRIP PE=1 SV=2	0.886494	513.3	238.2	450.1	216.1	12
P11142	Heat shock cognate 71 kDa protein OS=Homo sapiens GN=HSPA8 PE=1 SV=1	0.886472	1533.4	1771.5	1373.7	1556	17
Q7L1Q6	Basic leucine zipper and W2 domain-containing protein 1 OS=Homo sapiens GN=BZW1 PE=1 SV=1	0.885659	303.3	267.8	273.8	232	2
P55084	Trifunctional enzyme subunit beta, mitochondrial OS=Homo sapiens GN=HADHB PE=1 SV=3	0.884621	1192.8	1022.5	1044.3	915.4	7
P62987	Ubiquitin-60S ribosomal protein L40 OS=Homo sapiens GN=UBA52 PE=1 SV=2	0.884225	2120.7	2205.8	1844.7	1980.9	6
P05387	60S acidic ribosomal protein P2 OS=Homo sapiens GN=RPLP2 PE=1 SV=1	0.882946	2015.1	2197.5	1713.3	2006.2	9
P11586	C-1-tetrahydrofolate synthase, cytoplasmic OS=Homo sapiens GN=MTHFD1 PE=1 SV=3	0.882878	86.4	261.1	79.5	227.3	2
Q14694	Ubiquitin carboxyl-terminal hydrolase 10 OS=Homo sapiens GN=USP10 PE=1 SV=2	0.881778	391.2	263.5	332.8	244.5	2
P09234	U1 small nuclear ribonucleoprotein C OS=Homo sapiens GN=SNRPC PE=1 SV=1	0.881552	987.6	1208.3	858.2	1077.6	2
P62316	Small nuclear ribonucleoprotein Sm D2 OS=Homo sapiens GN=SNRPD2 PE=1 SV=1	0.880345	2217.6	2490.1	1962.6	2181.8	8
Q9GZT3	SRA stem-loop-interacting RNA-binding protein, mitochondrial OS=Homo sapiens GN=SLIRP PE=1 SV=1	0.879111	481.6	372.9	438	313.2	4
P42766	60S ribosomal protein L35 OS=Homo sapiens GN=RPL35 PE=1 SV=2	0.878742	761.2	1172.7	660.8	1038.6	4
Q9HBM6	Transcription initiation factor TFIID subunit 9B OS=Homo sapiens GN=TAF9B PE=1 SV=1	0.878507	570.6	509.3	501.1	447.6	4
P36578	60S ribosomal protein L4 OS=Homo sapiens GN=RPL4 PE=1 SV=5	0.878252	2462.2	2415.9	2213.1	2071.1	16
Q9UK45	U6 snRNA-associated Sm-like protein LSm7 OS=Homo sapiens GN=LSM7 PE=1 SV=1	0.878127	227.2	488.3	211.1	417.2	2
P63208	S-phase kinase-associated protein 1 OS=Homo sapiens GN=SKP1 PE=1 SV=2	0.87808	1122	1073.7	966	962	6
P33993	DNA replication licensing factor MCM7 OS=Homo sapiens GN=MCM7 PE=1 SV=4	0.877776	458.2	329.7	418.2	273.4	4
Q9Y3U8	60S ribosomal protein L36 OS=Homo sapiens GN=RPL36 PE=1 SV=3	0.877759	727.1	654.6	654	558.8	2
P26641	Elongation factor 1-gamma OS=Homo sapiens GN=EEF1G PE=1 SV=3	0.876547	239.8	624.5	212.7	544.9	3
Q9Y3F4	Serine-threonine kinase receptor-associated protein OS=Homo sapiens GN=STRAP PE=1 SV=1	0.876203	1471.1	981.3	1305.7	843.1	7
Q9NQT4	Exosome complex component RRP46 OS=Homo sapiens GN=EXOSC5 PE=1 SV=1	0.875848	292.3	253	241.9	235.7	2
P07237	Protein disulfide-isomerase OS=Homo sapiens GN=P4HB PE=1 SV=3	0.875657	688.1	681.5	590.5	608.8	7
O00541	Pescadillo homolog OS=Homo sapiens GN=PES1 PE=1 SV=1	0.875457	407.5	576.9	332.2	529.6	4
Q9Y333	U6 snRNA-associated Sm-like protein LSm2 OS=Homo sapiens GN=LSM2 PE=1 SV=1	0.875374	276.2	259	240.9	227.6	2
Q9UG63	ATP-binding cassette sub-family F member 2 OS=Homo sapiens GN=ABCF2 PE=1 SV=2	0.873233	769.8	715.6	657.6	639.5	5
P35249	Replication factor C subunit 4 OS=Homo sapiens GN=RFC4 PE=1 SV=2	0.872828	485.3	556.6	423.6	485.8	4
P52907	F-actin-capping protein subunit alpha-1 OS=Homo sapiens GN=CAPZA1 PE=1 SV=3	0.872804	176.4	341.7	138.2	314	2
P46781	40S ribosomal protein S9 OS=Homo sapiens GN=RPS9 PE=1 SV=3	0.872597	1293	1281.5	1086	1160.5	11
O00139	Kinesin-like protein KIF2A OS=Homo sapiens GN=KIF2A PE=1 SV=3	0.872493	68.2	71.4	51.3	70.5	2
P08579	U2 small nuclear ribonucleoprotein B'' OS=Homo sapiens GN=SNRPB2 PE=1 SV=1	0.872488	369.3	521.6	326.4	450.9	4
P39019	40S ribosomal protein S19 OS=Homo sapiens GN=RPS19 PE=1 SV=2	0.871822	2552.9	1848	2246.9	1589.9	9
Q9BQA1	Methylosome protein 50 OS=Homo sapiens GN=WDR77 PE=1 SV=1	0.870861	377.4	407.8	338.5	345.3	4
P52815	39S ribosomal protein L12, mitochondrial OS=Homo sapiens GN=MRPL12 PE=1 SV=2	0.870769	34	31	35.2	21.4	2
P60866	40S ribosomal protein S20 OS=Homo sapiens GN=RPS20 PE=1 SV=1	0.870113	745.4	755.9	703.7	602.6	3
Q9H4G4	Golgi-associated plant pathogenesis-related protein 1 OS=Homo sapiens GN=GLIPR2 PE=1 SV=3	0.869806	379.4	342.6	328.4	299.6	2
P54136	Arginine--tRNA ligase, cytoplasmic OS=Homo sapiens GN=RARS PE=1 SV=2	0.86882	822.6	536.6	734.1	446.8	5
P35998	26S protease regulatory subunit 7 OS=Homo sapiens GN=PSMC2 PE=1 SV=3	0.868747	114.9	87	107.2	68.2	2
Q9BWJ5	Splicing factor 3B subunit 5 OS=Homo sapiens GN=SF3B5 PE=1 SV=1	0.867859	444.5	472.7	378.7	417.3	3
Q13435	Splicing factor 3B subunit 2 OS=Homo sapiens GN=SF3B2 PE=1 SV=2	0.86714	3622.8	4737.9	3090.2	4159.7	23
P78347	General transcription factor II-I OS=Homo sapiens GN=GTF2I PE=1 SV=2	0.865764	257.7	244.4	230.2	204.5	2
P49756	RNA-binding protein 25 OS=Homo sapiens GN=RBM25 PE=1 SV=3	0.86546	2065.9	1863.8	1794.5	1606.5	11
Q15427	Splicing factor 3B subunit 4 OS=Homo sapiens GN=SF3B4 PE=1 SV=1	0.865045	993.1	972	896.6	803.3	2
Q96CW1	AP-2 complex subunit mu OS=Homo sapiens GN=AP2M1 PE=1 SV=2	0.863639	1043.2	553.3	902.5	476.3	4
Q9P270	SLAIN motif-containing protein 2 OS=Homo sapiens GN=SLAIN2 PE=1 SV=2	0.863619	120.3	148.8	90.6	141.8	2
Q01081	Splicing factor U2AF 35 kDa subunit OS=Homo sapiens GN=U2AF1 PE=1 SV=3	0.862654	548.4	353.7	474.8	303.4	2
P62310	U6 snRNA-associated Sm-like protein LSm3 OS=Homo sapiens GN=LSM3 PE=1 SV=2	0.861712	336.9	300.9	286.1	263.5	2
Q04837	Single-stranded DNA-binding protein, mitochondrial OS=Homo sapiens GN=SSBP1 PE=1 SV=1	0.861306	1595.3	1894.4	1409.6	1596.1	4
Q92616	eIF-2-alpha kinase activator GCN1 OS=Homo sapiens GN=GCN1 PE=1 SV=6	0.859589	85.6	89.6	79.2	71.4	3
P61353	60S ribosomal protein L27 OS=Homo sapiens GN=RPL27 PE=1 SV=2	0.858099	1250.4	901.1	1025.9	820.3	6
Q7L014	Probable ATP-dependent RNA helicase DDX46 OS=Homo sapiens GN=DDX46 PE=1 SV=2	0.857357	733.7	1067.3	640.6	903.5	6
P10809	60 kDa heat shock protein, mitochondrial OS=Homo sapiens GN=HSPD1 PE=1 SV=2	0.857334	1004.2	491.6	833.9	448.5	7
P32121	Beta-arrestin-2 OS=Homo sapiens GN=ARRB2 PE=1 SV=2	0.856763	464.9	400.8	397.3	344.4	3
Q71RC2	La-related protein 4 OS=Homo sapiens GN=LARP4 PE=1 SV=3	0.855024	310.8	167.9	261.2	148.1	2
Q15024	Exosome complex component RRP42 OS=Homo sapiens GN=EXOSC7 PE=1 SV=3	0.853034	232	209.6	197.3	179.4	3
Q9BVG4	Protein PBDC1 OS=Homo sapiens GN=PBDC1 PE=1 SV=1	0.852351	178.5	215	156.8	178.6	3
P47897	Glutamine--tRNA ligase OS=Homo sapiens GN=QARS PE=1 SV=1	0.850872	448.4	239.6	397.7	187.7	3
Q5T749	Keratinocyte proline-rich protein OS=Homo sapiens GN=KPRP PE=1 SV=1	0.848366	817.9	1167.8	690.2	994.4	6
P06493	Cyclin-dependent kinase 1 OS=Homo sapiens GN=CDK1 PE=1 SV=3	0.848282	306.8	426.8	249.2	373.1	4
P23528	Cofilin-1 OS=Homo sapiens GN=CFL1 PE=1 SV=3	0.845741	1043.2	932.7	874.3	796.8	6
Q9UI36	Dachshund homolog 1 OS=Homo sapiens GN=DACH1 PE=1 SV=3	0.845107	377.2	350.4	327.6	287.3	2
O00268	Transcription initiation factor TFIID subunit 4 OS=Homo sapiens GN=TAF4 PE=1 SV=2	0.842031	436.7	488.8	350.7	428.6	5
Q8N7H5	RNA polymerase II-associated factor 1 homolog OS=Homo sapiens GN=PAF1 PE=1 SV=2	0.841734	461.2	417.7	385.1	354.7	2
Q13200	26S proteasome non-ATPase regulatory subunit 2 OS=Homo sapiens GN=PSMD2 PE=1 SV=3	0.84155	592.6	488.5	518.5	391.3	4
Q8IWX8	Calcium homeostasis endoplasmic reticulum protein OS=Homo sapiens GN=CHERP PE=1 SV=3	0.839075	927.1	628.9	804.2	501.4	3
P61247	40S ribosomal protein S3a OS=Homo sapiens GN=RPS3A PE=1 SV=2	0.837563	3359.5	3528.1	2834	2934.8	12
Q15293	Reticulocalbin-1 OS=Homo sapiens GN=RCN1 PE=1 SV=1	0.832884	46.7	101.7	39.7	83.9	3
O43684	Mitotic checkpoint protein BUB3 OS=Homo sapiens GN=BUB3 PE=1 SV=1	0.832637	251.2	203.5	220.1	158.5	2
Q15459	Splicing factor 3A subunit 1 OS=Homo sapiens GN=SF3A1 PE=1 SV=1	0.82917	3158.4	2466.5	2556.2	2107.8	17
P62861	40S ribosomal protein S30 OS=Homo sapiens GN=FAU PE=1 SV=1	0.829145	527.8	339.6	426.9	292.3	2
P11387	DNA topoisomerase 1 OS=Homo sapiens GN=TOP1 PE=1 SV=2	0.829052	943.1	1030.6	773.7	862.6	8
P52434	DNA-directed RNA polymerases I, II, and III subunit RPABC3 OS=Homo sapiens GN=POLR2H PE=1 SV=4	0.826633	529.8	251.2	418.4	227.2	3
P36954	DNA-directed RNA polymerase II subunit RPB9 OS=Homo sapiens GN=POLR2I PE=1 SV=1	0.825205	156.1	149.4	123.5	128.6	2
P15880	40S ribosomal protein S2 OS=Homo sapiens GN=RPS2 PE=1 SV=2	0.824846	1600.1	1486.9	1324.3	1222	7
P62829	60S ribosomal protein L23 OS=Homo sapiens GN=RPL23 PE=1 SV=1	0.823844	2124.4	1908.4	1740.3	1582.1	7
Q12904	Aminoacyl tRNA synthase complex-interacting multifunctional protein 1 OS=Homo sapiens GN=AIMP1 PE=1 SV=2	0.822581	69.9	29.3	60.3	21.3	4
Q8IY81	pre-rRNA processing protein FTSJ3 OS=Homo sapiens GN=FTSJ3 PE=1 SV=2	0.822367	455.9	141.4	356.3	134.9	3
P68104	Elongation factor 1-alpha 1 OS=Homo sapiens GN=EEF1A1 PE=1 SV=1	0.821664	2957.9	3006.7	2388.2	2512.7	11
P53680	AP-2 complex subunit sigma OS=Homo sapiens GN=AP2S1 PE=1 SV=2	0.820995	241.8	326.9	205.5	261.4	2
P14618	Pyruvate kinase PKM OS=Homo sapiens GN=PKM PE=1 SV=4	0.82027	602	547.5	479.4	463.5	3
P62081	40S ribosomal protein S7 OS=Homo sapiens GN=RPS7 PE=1 SV=1	0.81886	748.9	791.9	600	661.7	3
O43670	BUB3-interacting and GLEBS motif-containing protein ZNF207 OS=Homo sapiens GN=ZNF207 PE=1 SV=1	0.817079	271.1	314.4	223.3	255.1	2
Q96B26	Exosome complex component RRP43 OS=Homo sapiens GN=EXOSC8 PE=1 SV=1	0.816403	240.4	853.3	246.2	646.7	4
P06576	ATP synthase subunit beta, mitochondrial OS=Homo sapiens GN=ATP5B PE=1 SV=3	0.815186	130.7	78.7	102.5	68.2	3
Q07021	Complement component 1 Q subcomponent-binding protein, mitochondrial OS=Homo sapiens GN=C1QBP PE=1 SV=1	0.814384	540.6	328.4	441.6	266.1	2
P37198	Nuclear pore glycoprotein p62 OS=Homo sapiens GN=NUP62 PE=1 SV=3	0.814244	335.8	209	295.4	148.2	2
P68371	Tubulin beta-4B chain OS=Homo sapiens GN=TUBB4B PE=1 SV=1	0.812042	2090	1781.6	1665.4	1478.5	13
P14923	Junction plakoglobin OS=Homo sapiens GN=JUP PE=1 SV=3	0.809174	260.2	339.3	205.4	279.7	5
Q9Y5M8	Signal recognition particle receptor subunit beta OS=Homo sapiens GN=SRPRB PE=1 SV=3	0.807761	128.8	95.4	95	86.1	2
Q15003	Condensin complex subunit 2 OS=Homo sapiens GN=NCAPH PE=1 SV=3	0.807018	156.7	48.5	128.1	37.5	3
Q12824	SWI/SNF-related matrix-associated actin-dependent regulator of chromatin subfamily B member 1 OS=Homo sapiens GN=SMARCB1 PE=1 SV=2	0.804536	249	121.4	202.8	95.2	2
Q7RTV0	PHD finger-like domain-containing protein 5A OS=Homo sapiens GN=PHF5A PE=1 SV=1	0.803008	512.6	597.6	408.1	483.4	3
Q9NQS7	Inner centromere protein OS=Homo sapiens GN=INCENP PE=1 SV=3	0.802668	149.4	172.9	117.2	141.5	3
P47756	F-actin-capping protein subunit beta OS=Homo sapiens GN=CAPZB PE=1 SV=4	0.801899	181.4	208.3	146.1	166.4	3
P39748	Flap endonuclease 1 OS=Homo sapiens GN=FEN1 PE=1 SV=1	0.798875	364.3	115.5	286.6	96.7	2
Q15393	Splicing factor 3B subunit 3 OS=Homo sapiens GN=SF3B3 PE=1 SV=4	0.796197	4057.2	3621.8	3331.5	2782.5	24
P68363	Tubulin alpha-1B chain OS=Homo sapiens GN=TUBA1B PE=1 SV=1	0.796167	2118.9	2284.7	1582.9	1923.1	12
Q9P0K7	Ankycorbin OS=Homo sapiens GN=RAI14 PE=1 SV=2	0.796041	193.1	322.2	157.4	252.8	2
P62318	Small nuclear ribonucleoprotein Sm D3 OS=Homo sapiens GN=SNRPD3 PE=1 SV=1	0.793067	295.7	275.5	242.8	210.2	3
P63241	Eukaryotic translation initiation factor 5A-1 OS=Homo sapiens GN=EIF5A PE=1 SV=2	0.789767	191.6	455.3	144.8	366.1	2
P62304	Small nuclear ribonucleoprotein E OS=Homo sapiens GN=SNRPE PE=1 SV=1	0.784303	218.7	161	166.9	130.9	3
O94992	Protein HEXIM1 OS=Homo sapiens GN=HEXIM1 PE=1 SV=1	0.782887	276.3	254.3	186.7	228.7	4
P62913	60S ribosomal protein L11 OS=Homo sapiens GN=RPL11 PE=1 SV=2	0.782505	1037.7	1103.5	776.7	898.8	6
Q9Y230	RuvB-like 2 OS=Homo sapiens GN=RUVBL2 PE=1 SV=3	0.782265	404.4	568.8	383.3	378	6
P15924	Desmoplakin OS=Homo sapiens GN=DSP PE=1 SV=3	0.778331	858.7	1151.5	696.8	867.8	7
P42696	RNA-binding protein 34 OS=Homo sapiens GN=RBM34 PE=1 SV=2	0.776884	318	154.4	247.9	119.1	2
Q8IWZ8	SURP and G-patch domain-containing protein 1 OS=Homo sapiens GN=SUGP1 PE=1 SV=2	0.775291	919.4	908.3	699.7	717.3	7
P31153	S-adenosylmethionine synthase isoform type-2 OS=Homo sapiens GN=MAT2A PE=1 SV=1	0.774813	298.1	222.8	226	177.6	2
Q8WXX5	DnaJ homolog subfamily C member 9 OS=Homo sapiens GN=DNAJC9 PE=1 SV=1	0.774763	857.8	1272.4	658.8	991.6	6
E9PAV3	Nascent polypeptide-associated complex subunit alpha, muscle-specific form OS=Homo sapiens GN=NACA PE=1 SV=1	0.773924	439.4	422.7	349.9	317.3	3
O14744	Protein arginine N-methyltransferase 5 OS=Homo sapiens GN=PRMT5 PE=1 SV=4	0.773684	2551.4	1794.3	1938.2	1424	14
Q02413	Desmoglein-1 OS=Homo sapiens GN=DSG1 PE=1 SV=2	0.7691	252.4	218.8	149.5	212.9	3
Q9H8G2	Caspase activity and apoptosis inhibitor 1 OS=Homo sapiens GN=CAAP1 PE=1 SV=2	0.767621	511.2	554.3	399.8	418.1	3
Q9Y421	Protein FAM32A OS=Homo sapiens GN=FAM32A PE=1 SV=2	0.762981	961.7	303.6	752.8	212.6	3
P08779	SWISS-PROT:P08779 Tax_Id=9606 Gene_Symbol=KRT16 Keratin, type I cytoskeletal 16	0.756621	225.4	291.9	177.5	213.9	16
Q9UHX1	Poly(U)-binding-splicing factor PUF60 OS=Homo sapiens GN=PUF60 PE=1 SV=1	0.749182	419.7	374.5	306.4	288.6	3
Q15545	Transcription initiation factor TFIID subunit 7 OS=Homo sapiens GN=TAF7 PE=1 SV=1	0.735854	154.9	223.3	119.8	158.5	3
Q96I25	Splicing factor 45 OS=Homo sapiens GN=RBM17 PE=1 SV=1	0.733676	1320.5	1090.1	968.4	800.2	8
O95402	Mediator of RNA polymerase II transcription subunit 26 OS=Homo sapiens GN=MED26 PE=1 SV=2	0.731608	310.1	277.1	233.7	195.9	2
O14950	Myosin regulatory light chain 12B OS=Homo sapiens GN=MYL12B PE=1 SV=2	0.729984	355.4	858.6	243.8	642.4	4
Q86YZ3	Hornerin OS=Homo sapiens GN=HRNR PE=1 SV=2	0.72556	46.2	739.4	24.2	545.8	4
P04637	Cellular tumor antigen p53 OS=Homo sapiens GN=TP53 PE=1 SV=4	0.722791	1113.9	1062.8	835.7	737.6	5
P30050	60S ribosomal protein L12 OS=Homo sapiens GN=RPL12 PE=1 SV=1	0.720136	2240.2	1999	1590.8	1462	9
P02538	SWISS-PROT:P02538 Tax_Id=9606 Gene_Symbol=KRT6A Keratin, type II cytoskeletal 6A	0.714438	686.4	438.4	488	315.6	17
Q8N1N4-2	SWISS-PROT:Q8N1N4-2 Tax_Id=9606 Gene_Symbol=KRT78 Isoform 2 of Keratin, type II cytoskeletal 78	0.710161	122.8	244.3	97	163.7	4
P42677	40S ribosomal protein S27 OS=Homo sapiens GN=RPS27 PE=1 SV=3	0.69522	928.9	669.3	648.7	462.4	3
P50991	T-complex protein 1 subunit delta OS=Homo sapiens GN=CCT4 PE=1 SV=4	0.690476	140.4	132.6	96.6	91.9	3
Q15370	Elongin-B OS=Homo sapiens GN=ELOB PE=1 SV=1	0.681456	733.3	923.3	465.6	663.3	4
Q9ULW3	Activator of basal transcription 1 OS=Homo sapiens GN=ABT1 PE=1 SV=1	0.67952	141.3	133.6	94.7	92.1	2
P42771	Cyclin-dependent kinase inhibitor 2A OS=Homo sapiens GN=CDKN2A PE=1 SV=2	0.67694	229.4	39.9	148.5	33.8	2
Q96AG4	Leucine-rich repeat-containing protein 59 OS=Homo sapiens GN=LRRC59 PE=1 SV=1	0.675519	792.3	811.8	503.1	580.5	3
Q9NPD3	Exosome complex component RRP41 OS=Homo sapiens GN=EXOSC4 PE=1 SV=3	0.671244	219.8	413.8	184.3	241	2
Q9P031	Thyroid transcription factor 1-associated protein 26 OS=Homo sapiens GN=CCDC59 PE=1 SV=2	0.658686	186.7	205.9	133.4	125.2	2
Q12874	Splicing factor 3A subunit 3 OS=Homo sapiens GN=SF3A3 PE=1 SV=1	0.650629	1319	1480.6	892.2	929.3	9
P81605	Dermcidin OS=Homo sapiens GN=DCD PE=1 SV=2	0.642109	1266.4	738.4	856.4	430.9	2
P02533	Keratin, type I cytoskeletal 14 OS=Homo sapiens GN=KRT14 PE=1 SV=4	0.628508	1733.9	1900.9	1070.4	1214.1	17
P04406	Glyceraldehyde-3-phosphate dehydrogenase OS=Homo sapiens GN=GAPDH PE=1 SV=3	0.627799	308	228	185.9	150.6	4
P49757	Protein numb homolog OS=Homo sapiens GN=NUMB PE=1 SV=2	0.62485	392.5	525.8	237.6	336.2	2
P08238	Heat shock protein HSP 90-beta OS=Homo sapiens GN=HSP90AB1 PE=1 SV=4	0.612257	1444.5	1231.5	963.2	675.2	9
O00505	Importin subunit alpha-4 OS=Homo sapiens GN=KPNA3 PE=1 SV=2	0.603535	106	352.3	97	179.6	2
O43175	D-3-phosphoglycerate dehydrogenase OS=Homo sapiens GN=PHGDH PE=1 SV=4	0.598877	211.9	126.4	123.4	79.2	2
P13647	Keratin, type II cytoskeletal 5 OS=Homo sapiens GN=KRT5 PE=1 SV=3	0.57744	2679.6	3558.1	1438.2	2163.7	25
P10599	Thioredoxin OS=Homo sapiens GN=TXN PE=1 SV=3	0.575143	632.9	717.2	383	393.5	2
Q9NPJ6	Mediator of RNA polymerase II transcription subunit 4 OS=Homo sapiens GN=MED4 PE=1 SV=1	0.573121	1037.3	895.8	599.7	508.2	6
Q9UKN8	General transcription factor 3C polypeptide 4 OS=Homo sapiens GN=GTF3C4 PE=1 SV=2	0.568715	109.9	69.1	50.3	51.5	2
P62937	Peptidyl-prolyl cis-trans isomerase A OS=Homo sapiens GN=PPIA PE=1 SV=2	0.547709	852	1192.7	448.9	671	4
P35908	Keratin, type II cytoskeletal 2 epidermal OS=Homo sapiens GN=KRT2 PE=1 SV=2	0.531509	7616.7	8957.8	4055.1	4754.4	36
P43487	Ran-specific GTPase-activating protein OS=Homo sapiens GN=RANBP1 PE=1 SV=1	0.52924	130.2	109.2	70.9	55.8	2
P35527	SWISS-PROT:P35527 Tax_Id=9606 Gene_Symbol=KRT9 Keratin, type I cytoskeletal 9	0.507991	4325	5630.5	2153.4	2903.9	22
P13645	SWISS-PROT:P13645 Tax_Id=9606 Gene_Symbol=KRT10 Keratin, type I cytoskeletal 10	0.502468	8420.4	8354.6	4423.1	4005.8	32
Q06830	Peroxiredoxin-1 OS=Homo sapiens GN=PRDX1 PE=1 SV=1	0.471502	1446.3	948.6	704.9	424.3	4
P04264	Keratin, type II cytoskeletal 1 OS=Homo sapiens GN=KRT1 PE=1 SV=6	0.453385	13548.7	13642.3	6202.7	6125.3	40
Q5D862	Filaggrin-2 OS=Homo sapiens GN=FLG2 PE=1 SV=1	0.450648	549.2	176.2	262	64.9	3
Q7L7X3	Serine/threonine-protein kinase TAO1 OS=Homo sapiens GN=TAOK1 PE=1 SV=1	0.427012	797.1	998.4	332.5	434.2	4
P06702	Protein S100-A9 OS=Homo sapiens GN=S100A9 PE=1 SV=1	0.395595	230.5	259.9	102.4	91.6	2
P01871	Immunoglobulin heavy constant mu OS=Homo sapiens GN=IGHM PE=1 SV=4	0.385451	392	436.9	164.1	155.4	2
P05166	Propionyl-CoA carboxylase beta chain, mitochondrial OS=Homo sapiens GN=PCCB PE=1 SV=3	0.347694	485.8	373	165.3	133.3	2
P11182	Lipoamide acyltransferase component of branched-chain alpha-keto acid dehydrogenase complex, mitochondrial OS=Homo sapiens GN=DBT PE=1 SV=3	0.323432	1965.7	946.5	678.1	263.8	2
P02647	Apolipoprotein A-I OS=Homo sapiens GN=APOA1 PE=1 SV=1	0.310856	855.4	1607.8	302.2	463.5	3
P01024	Complement C3 OS=Homo sapiens GN=C3 PE=1 SV=2	0.303206	1090.2	1239.9	331.3	375.2	7
P01859	Immunoglobulin heavy constant gamma 2 OS=Homo sapiens GN=IGHG2 PE=1 SV=2	0.261374	3806.1	3509.1	1077.2	834.8	6
P02790	Hemopexin OS=Homo sapiens GN=HPX PE=1 SV=2	0.256942	350.3	261.9	68.4	88.9	2
P00738	Haptoglobin OS=Homo sapiens GN=HP PE=1 SV=1	0.256057	2316.3	2231.9	664.6	500	6
P02675	Fibrinogen beta chain OS=Homo sapiens GN=FGB PE=1 SV=2	0.239699	367.9	403.9	93.2	91.8	2
P02671	Fibrinogen alpha chain OS=Homo sapiens GN=FGA PE=1 SV=2	0.233518	1419	2485.2	236.8	674.9	4
P01009	Alpha-1-antitrypsin OS=Homo sapiens GN=SERPINA1 PE=1 SV=3	0.224579	1283.6	1271.4	265.2	308.6	3
P02787	Serotransferrin OS=Homo sapiens GN=TF PE=1 SV=3	0.21007	3320.5	2057.7	677.8	452	8
P0DOY2	Immunoglobulin lambda constant 2 OS=Homo sapiens GN=IGLC2 PE=1 SV=1	0.200799	565.4	786.7	119.9	151.6	2
Q9HCC0	Methylcrotonoyl-CoA carboxylase beta chain, mitochondrial OS=Homo sapiens GN=MCCC2 PE=1 SV=1	0.188053	4107.5	4477.3	765.7	848.7	10
P01876	Immunoglobulin heavy constant alpha 1 OS=Homo sapiens GN=IGHA1 PE=1 SV=2	0.184606	611.6	738.3	98.2	151	2
P01857	Immunoglobulin heavy constant gamma 1 OS=Homo sapiens GN=IGHG1 PE=1 SV=1	0.177488	854.9	757.6	128.5	157.7	6
Q07065	Cytoskeleton-associated protein 4 OS=Homo sapiens GN=CKAP4 PE=1 SV=2	0.165841	25316.4	23216.8	4334.3	3714.5	42
P31151	Protein S100-A7 OS=Homo sapiens GN=S100A7 PE=1 SV=4	0.165071	939.1	544.5	140.5	104.4	3
P01834	Immunoglobulin kappa constant OS=Homo sapiens GN=IGKC PE=1 SV=2	0.155833	285.8	58.8	49.6	4.1	2
P02768-1	SWISS-PROT:P02768-1 Tax_Id=9606 Gene_Symbol=ALB Isoform 1 of Serum albumin precursor	0.128054	21704.5	20722.8	2724.8	2708.2	31
